# Supplementary material for: Synthesis of Novel Arginine Building Blocks with Increased Lipophilicity Compatible with Solid-Phase Peptide Synthesis
Source: MDPI journal article supplement (doi:10.3390/molecules28237780), 2023-11-25
Supplement: s1 [file s1]

## Supplementary Materials

for

### Synthesis of Novel Arginine Building Blocks with Increased Lipophilicity Compatible with Solid-Phase Peptide Synthesis

Mladena Glavaš<sup>1,2</sup>, Agata Gitlin-Domagalska<sup>1\*</sup>, Natalia Ptaszyńska<sup>1</sup>, Dominika Starego<sup>1</sup>, Sylwia Freza<sup>3</sup>, Dawid Dębowski<sup>1</sup>, Aleksandra Maciejewska<sup>1</sup>, Anna Łęgowska<sup>1</sup>, Chaim Gilon<sup>4</sup>, and Krzysztof Rolka<sup>1</sup>

<sup>1</sup> Department of Molecular Biochemistry, Faculty of Chemistry, University of Gdansk, Wita Stwosza 63, 80-308 Gdansk, Poland; mglavas@irb.hr (M.G.); natalia.ptaszynska@ug.edu.pl (N.P.); dominika.starego@phdstud.ug.edu.pl (D.S.); dawid.debowski@ug.edu.pl (D.D.); aleksandra.maciejewska@phdstud.ug.edu.pl (A.H.-M.); anna.legowska@ug.edu.pl (A.L.); krzysztof.rolka@ug.edu.pl (K.R.)

<sup>2</sup> Department of Organic Chemistry and Biochemistry, Ruđer Bošković Institute, Bijenička cesta 54, 10 000 Zagreb, Croatia; mglavas@irb.hr (M.G.)

<sup>3</sup> Department of Theoretical Chemistry, Faculty of Chemistry, University of Gdansk, Wita Stwosza 63, 80-308 Gdansk, Poland; sylwia.freza@ug.edu.pl (S.F.)

<sup>4</sup> Department of Organic Chemistry, Institute of Chemistry, The Hebrew University, Jerusalem 91904, Israel; chaimgilon@gmail.com (C.G.)

\* Correspondence: agata.domagalska@ug.edu.pl

#### Content

|                                                                                      |    |
|--------------------------------------------------------------------------------------|----|
| 1. Characterization of dicarbamates 1 - 7                                            | 1  |
| 1.1. Diethyl(iminomethylene)dicarbamate (1)                                          | 1  |
| 1.2. Dipropyl(iminomethylene)dicarbamate (2)                                         | 2  |
| 1.3. Dibutyl(iminomethylene)dicarbamate (3)                                          | 2  |
| 1.4. Dihexyl(iminomethylene)dicarbamate (4)                                          | 2  |
| 1.5. Dioctyl(iminomethylene)dicarbamate (5)                                          | 2  |
| 1.6. Didecyl(iminomethylene)dicarbamate (6)                                          | 2  |
| 1.7. Didodecyl(iminomethylene)dicarbamate (7)                                        | 2  |
| 2. Characterization of AVP-derivatives 2B – 4B                                       | 2  |
| 2.1. AVP(Pr) <sub>2</sub> (2B)                                                       | 2  |
| 2.2. AVP(Bu) <sub>2</sub> (3B)                                                       | 3  |
| 2.3. AVP(Hoc) <sub>2</sub> (4B)                                                      | 3  |
| 3. Synthesis of Arg-derivatives 1A – 7A using of Fmoc-Arg-OMe as a starting compound | 3  |
| 4. NMR, MALDI-MS, ESI-MS and HPLC spectra                                            | 5  |
| 4.1. Reaction of 3 and 5 with iso-butylamine                                         | 35 |
| 4.2. NMR comparison of compounds 1 and 2                                             | 37 |
| 1. Characterization of dicarbamates 1 - 7                                            |    |
| 1.1. Diethyl(iminomethylene)dicarbamate (1)                                          |    |

35 % (3.53 mmol, 0.718 g), white solid,  $m_p = 85 - 108$ ;  $^1\text{H}$  NMR ( $\text{CD}_3\text{OD}$ , 500 MHz):  $\delta$  4.19 – 4.15 (m, 4H), 1.30 – 1.27 (m, 6H);  $^{13}\text{C}$  NMR ( $\text{CD}_3\text{OD}$ , 126 MHz):  $\delta$  160.7, 62.8, 14.6; MALDI-MS: calculated for  $\text{C}_7\text{H}_{13}\text{N}_3\text{O}_4$  ( $[\text{M} + \text{H}]^+$ ) 204.098 and ( $[\text{M} + \text{Na}]^+$ ) 226.080; found 204.175 and 226.152.

#### 1.2. Dipropyl(iminomethylene)dicarbamate (2)

57 % (5.71 mmol, 1.32 g), white solid,  $m_p = 83 - 90$ ;  $^1\text{H}$  NMR ( $\text{CD}_3\text{OD}$ , 500 MHz):  $\delta$  4.10 – 4.07 (m, 4H), 1.72 – 1.65 (m, 4H), 0.97 – 0.96 (m, 6H);  $^{13}\text{C}$  NMR ( $\text{CD}_3\text{OD}$ , 126 MHz):  $\delta$  160.8, 68.4, 23.2, 10.6; MALDI-MS: calculated for  $\text{C}_9\text{H}_{17}\text{N}_3\text{O}_4$  ( $[\text{M} + \text{H}]^+$ ) 232.128 and ( $[\text{M} + \text{Na}]^+$ ) 254.110; found 232.374 and 254.331.

#### 1.3. Dibutyl(iminomethylene)dicarbamate (3)

84 % (8.37 mmol, 2.17 g), pale yellow solid,  $m_p = 67 - 90$ ;  $^1\text{H}$  NMR ( $\text{CD}_3\text{OD}$ , 500 MHz):  $\delta$  4.32 – 4.29 (m, 4H), 1.74 – 1.69 (m, 4H), 1.48 – 1.41 (m, 4H), 0.99 – 0.96 (m, 6H);  $^{13}\text{C}$  NMR ( $\text{CD}_3\text{OD}$ , 126 MHz):  $\delta$  155.9, 154.6, 68.9, 31.5, 19.8, 13.9; MALDI-MS: calculated for  $\text{C}_{11}\text{H}_{21}\text{N}_3\text{O}_4$  ( $[\text{M} + \text{H}]^+$ ) 260.158; found 260.008.

#### 1.4. Dihexyl(iminomethylene)dicarbamate (4)

67 % (6.66 mmol, 2.10 g), pale yellow solid,  $m_p = 62 - 101$ ;  $^1\text{H}$  NMR ( $\text{CD}_3\text{OD}$ , 500 MHz):  $\delta$  4.27 – 4.24 (m, 2H), 4.13 – 4.11 (m, 2H), 1.74 – 1.63 (m, 4H), 1.43 – 1.33 (m, 12H), 0.94 – 0.90 (m, 6H);  $^{13}\text{C}$  NMR ( $\text{CD}_3\text{OD}$ , 126 MHz):  $\delta$  68.4, 66.9, 32.6, 32.5, 29.9, 29.6, 26.6, 26.5, 23.6, 14.3; MALDI-MS: calculated for  $\text{C}_{15}\text{H}_{29}\text{N}_3\text{O}_4$  ( $[\text{M} + \text{H}]^+$ ) 316.228 and ( $[\text{M} + \text{Na}]^+$ ) 338.210; found 316.170 and 338.149.

#### 1.5. Dioctyl(iminomethylene)dicarbamate (5)

70 % (6.99 mmol, 2.60 g), white solid,  $m_p = 62 - 73$ ;  $^1\text{H}$  NMR ( $\text{CDCl}_3$ , 500 MHz):  $\delta$  8.49 (s, 1H), 8.28 (s, 1H), 4.24 – 4.15 (m, 4H), 1.71 – 1.64 (m, 4H), 1.38 – 1.24 (m, 20H), 0.90 – 0.85 (m, 6H);  $^{13}\text{C}$  NMR ( $\text{CDCl}_3$ , 126 MHz):  $\delta$  157.5, 156.6, 153.2, 67.9, 67.3, 31.9, 29.3, 29.2, 28.7, 28.5, 25.8, 25.6, 22.8, 14.2; MALDI-MS: calculated for  $\text{C}_{19}\text{H}_{37}\text{N}_3\text{O}_4$  ( $[\text{M} + \text{H}]^+$ ) 372.228; found 372.279.

#### 1.6. Didecyl(iminomethylene)dicarbamate (6)

53 % (5.31 mmol, 2.27 g), white solid,  $m_p = 44 - 62$ ;  $^1\text{H}$  NMR ( $\text{CDCl}_3$ , 500 MHz):  $\delta$  8.60 (s, 1H), 8.30 (s, 1H), 4.25 – 4.09 and 3.65 – 3.62 (m, 4H), 1.70 – 1.54 (m, 4H), 1.35 – 1.23 (m, 28H), 0.90 – 0.85 (m, 6H);  $^{13}\text{C}$  NMR ( $\text{CDCl}_3$ , 126 MHz):  $\delta$  158.2, 156.5, 153.4, 67.9, 66.6, 63.2, 32.9, 32.0, 29.7, 29.4, 29.3, 28.8, 28.6, 25.9, 25.6, 22.8, 14.2; MALDI-MS: calculated for  $\text{C}_{23}\text{H}_{45}\text{N}_3\text{O}_4$  ( $[\text{M} + \text{H}]^+$ ) 428.348; found 428.355.

#### 1.7. Didodecyl(iminomethylene)dicarbamate (7)

94 % (9.45 mmol, 4.57 g), white solid,  $m_p = 69 - 92$ ;  $^1\text{H}$  NMR ( $\text{CDCl}_3$ , 500 MHz):  $\delta$  9.02 – 8.01 (m, 1H), 4.25 – 4.09 and 3.65 – 3.61 (m, 4H), 1.70 – 1.53 (m, 4H), 1.36 – 1.24 (m, 36H), 0.90 – 0.85 (m, 6H);  $^{13}\text{C}$  NMR ( $\text{CDCl}_3$ , 126 MHz):  $\delta$  157.9, 68.2, 66.8, 63.2, 32.9, 32.1, 29.8, 29.7, 29.6, 29.5, 29.4, 28.8, 28.7, 25.9, 22.8, 14.2; MALDI-MS: calculated for  $\text{C}_{27}\text{H}_{53}\text{N}_3\text{O}_4$  ( $[\text{M} + \text{H}]^+$ ) 484.408; found 484.388.

## 2. Characterization of AVP-derivatives **2B** – **4B**

#### 2.1. AVP(*Pr*)<sub>2</sub> (**2B**)

23 % (0.075 mmol, 94 mg), white solid;  $^1\text{H}$  NMR ( $\text{CD}_3\text{OD}$ , 500 MHz):  $\delta$  7.25 – 7.14 (m, 3H), 7.10 – 6.98 (m, 4H), 6.74 – 6.65 (m, 2H), 5.95 – 4.89 (m, 1H), 4.59 (t,  $J = 7.1$  Hz, 1H), 4.39 – 4.33 (m, 1H), 4.28 – 4.19 (m, 2H), 4.18 – 4.12 (m, 2H), 4.10 – 4.01 (m, 3H), 3.97 – 3.92 (m, 1H), 3.91 – 3.82 (m, 1H), 3.82 – 3.71 (m, 2H), 3.70 – 3.63 (m, 1H), 3.49 – 3.37 (m, 3H), 3.23 – 3.10 (m, 4H), 3.07 – 2.95 (m, 3H), 2.92 – 2.86 (m, 1H), 2.82 – 2.73 (m, 2H), 2.29 – 2.12 (m, 4H), 2.10 – 1.88 (m, 5H), 1.79 – 1.62 (m, 7H), 0.98 – 0.89 (m, 6H);  $^{13}\text{C}$  NMR ( $\text{CD}_3\text{OD}$ , 126 MHz):  $\delta$  178.2, 174.9, 174.3, 173.6, 170.6, 154.7, 131.7, 130.3, 129.7, 128.6, 127.8, 116.4, 69.8, 69.1, 62.3, 58.9, 56.3, 54.7, 54.0, 52.5, 51.4, 43.3, 42.1, 41.0, 38.6, 37.1, 32.6, 30.4, 29.1, 26.9, 26.4, 26.2, 23.2, 22.9, 10.7, 10.5; ESI-MS: calculated for  $\text{C}_{54}\text{H}_{77}\text{N}_{15}\text{O}_{16}\text{S}_2$   $[\text{M} + \text{H}]^+$  1256.5194; found 1256.7073; HPLC 15.97 min, ClogP = 0.225.

## 2.2. AVP(Bu)<sub>2</sub> (**3B**)

22 % (0.036 mmol, 46.7 mg), white solid; <sup>1</sup>H NMR (CD<sub>3</sub>OD, 500 MHz): δ 8.68 – 8.56 (m, 0.5H), 8.21 – 8.17 (m, 0.5H), 7.29 – 7.24 (m, 2H), 7.22 – 7.18 (m, 1H), 7.13 – 7.04 (m, 4H), 6.76 – 6.71 (m, 2H), 4.99 – 4.94 (m, 1H), 4.65 – 4.60 (m, 1H), 4.43 – 4.38 (m, 1H), 4.31 – 4.20 (m, 4H), 4.20 – 4.14 (m, 2H), 4.11 – 4.07 (m, 1H), 4.04 – 3.97 (m, 1H), 3.94 – 3.88 (m, 1H), 3.86 – 3.77 (m, 2H), 3.75 – 3.69 (m, 1H), 2.32 – 2.16 (m, 4H), 2.13 – 2.04 (m, 2H), 2.03 – 1.91 (m, 3H), 1.84 – 1.73 (m, 2H), 1.72 – 1.64 (m, 5H), 1.47 – 1.39 (m, 4H), 0.99 – 0.94 (m, 6H); <sup>13</sup>C NMR (CD<sub>3</sub>OD, 126 MHz): δ 178.2, 174.8, 170.6, 157.6, 138.6, 131.7, 130.3, 129.7, 128.6, 127.8, 116.4, 68.3, 67.6, 62.3, 56.4, 54.7, 53.9, 43.2, 42.9, 42.3, 38.6, 37.1, 32.6, 31.9, 31.6, 30.4, 29.0, 26.9, 26.3, 26.2, 20.1, 19.9, 14.1; ESI-MS: calculated for C<sub>56</sub>H<sub>81</sub>N<sub>15</sub>O<sub>16</sub>S<sub>2</sub> [M+H<sup>+</sup>] 1284.5507; found 1284.7415; HPLC 19.98 min. (method 10 – 90 of phase B/40 min); ClogP = 1.283.

## 2.3 AVP(Hoc)<sub>2</sub> (**4B**)

30 % (0.097 mmol, 130 mg), white solid; <sup>1</sup>H NMR (CD<sub>3</sub>OD, 500 MHz): δ 7.28 – 7.24 (m, 2H), 7.22 – 7.18 (m, 1H), 7.14 – 7.09 (m, 2H), 7.07 – 7.04 (m, 2H), 6.76 – 6.71 (m, 2H), 4.98 – 4.93 (m, 1H), 4.63 (t, *J* = 7.3 Hz, 1H), 4.43 – 4.38 (m, 1H), 4.29 – 4.20 (m, 4H), 4.14 – 4.07 (m, 3H), 4.01 – 3.96 (m, 1H), 3.85 – 3.76 (m, 2H), 3.74 – 3.68 (m, 1H), 3.47 – 3.42 (m, 2H), 3.26 – 3.17 (m, 3H), 3.11 – 2.99 (m, 3H), 2.96 – 2.90 (m, 1H), 2.85 – 2.79 (m, 2H), 2.31 – 2.16 (m, 4H), 2.13 – 1.92 (m, 5H), 1.81 – 1.64 (m, 7H), 1.43 – 1.32 (M, 12H), 0.94 – 0.89 (m, 6H); <sup>13</sup>C NMR (CD<sub>3</sub>OD, 126 MHz): δ 178.2, 174.8, 167.7, 157.6, 154.8, 138.6, 131.7, 130.3, 129.7, 128.6, 127.8, 116.4, 68.3, 67.4, 62.3, 58.9, 56.3, 54.8, 54.0, 52.5, 43.3, 42.9, 41.9, 38.6, 37.1, 32.7, 32.6, 30.4, 29.9, 29.6, 29.1, 26.9, 26.7, 26.5, 26.2, 23.6, 14.3; ESI-MS: calculated for C<sub>60</sub>H<sub>89</sub>N<sub>15</sub>O<sub>16</sub>S<sub>2</sub> [M+H<sup>+</sup>] 1340.6133; found 1340.8142; HPLC 25.13 min. (method 10 – 90 of phase B/40 min); ClogP = 3.399.

## 3. Synthesis of Arg-derivatives **1A** – **7A** using of Fmoc-Arg-OMe as a starting compound

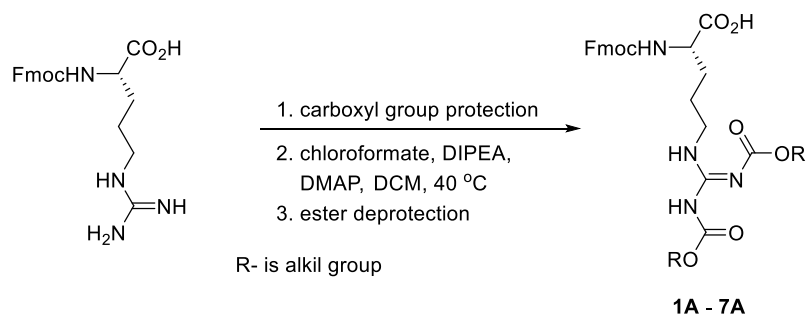

**Scheme S1.** Synthesis of Arg-derivatives **1A** – **7A** through three steps, starting from Fmoc-Arg

**Table S1.** Optimization of reaction conditions for the side chain chloroformate protection.

| Entry | n (FmocArgOMe)/mmol | base/eq. | chloroformate/eq. | solvent/mL | t/°C; t/h | η/% <sup>o</sup> |
|-------|---------------------|----------|-------------------|------------|-----------|------------------|
|-------|---------------------|----------|-------------------|------------|-----------|------------------|

|   |                      |           |           |         |        |      |
|---|----------------------|-----------|-----------|---------|--------|------|
| 1 | 0.085 <sup>a</sup>   | DIPEA/6.5 | ethyl/6.5 | DCM/1.4 | rt; 28 | 49   |
| 2 | 0.073 <sup>b</sup>   | DIPEA/4.5 | ethyl/4.5 | DCM/1.2 | rt; 72 | 36   |
| 3 | 0.085 <sup>c</sup>   | DIPEA/4.5 | ethyl/4.5 | DMF/1.4 | rt; 72 | -    |
| 4 | 0.085 <sup>c,d</sup> | DIPEA/4.5 | ethyl/4.5 | DCM/1.4 | rt; 24 | < 10 |
| 5 | 0.080                | DIPEA/6.5 | ethyl/6.5 | DCM/1.3 | 40; 24 | 70   |
| 6 | 0.244 <sup>c,d</sup> | DIPEA/6.5 | ethyl/6.5 | DCM/4   | 40; 24 | 68   |
| 7 | 0.244 <sup>c,d</sup> | DIPEA/6.5 | ethyl/6.5 | DCM/4   | 40; 48 | 44   |
| 8 | 2.44 <sup>c,d</sup>  | DIPEA/6.5 | ethyl/6.5 | DCM/40  | 40; 24 | 88   |

<sup>a</sup>The reaction started with 2.5 eq. of base and chloroformate. After 2h of stirring was added 2.5 eq., additionally and after 24h of stirring 1.5 eq.; <sup>b</sup>After every 1h of stirring was added 1.5 eq. of base and chloroformate; <sup>c</sup>The reaction started with 2.5 eq. of base and chloroformate. After 2h of stirring was added 2.5 eq., additionally and after 24h of stirring 1.5 eq.; <sup>d</sup>Catalytic amount of DMAP was used; <sup>e</sup>The yield is calculated according to both isomers.

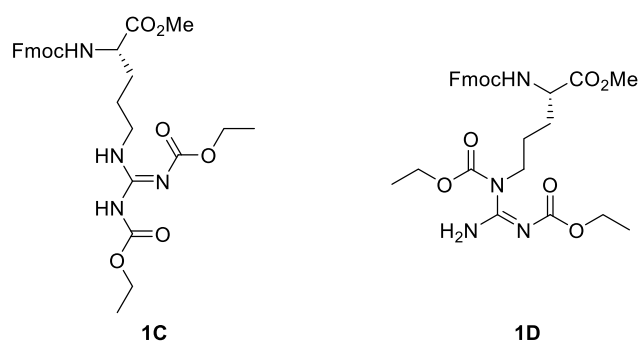

**Figure S1.** Structure of compounds obtained in the reaction of Fmoc-Arg-OMe and ethyl chloroformate.

#### 4. NMR, MALDI-MS, ESI-MS and HPLC spectra

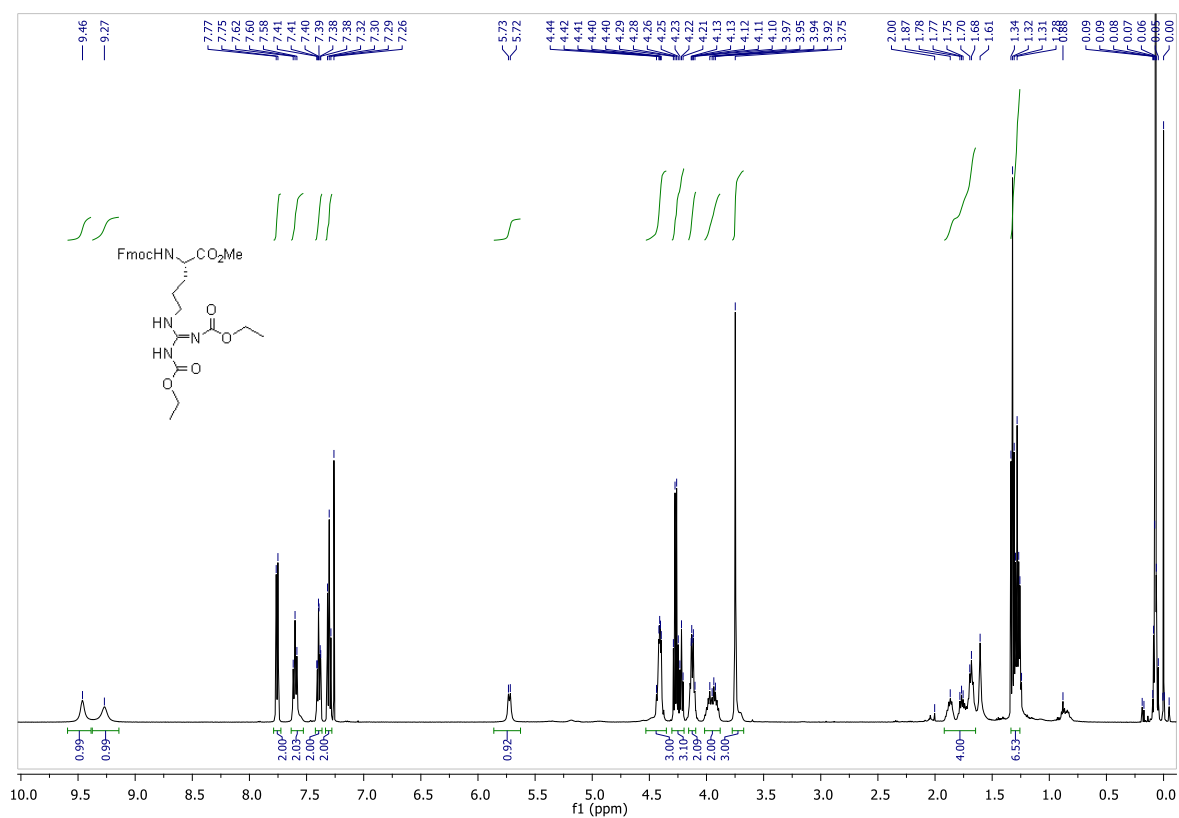

<sup>1</sup>H NMR (CDCl<sub>3</sub>, 500 MHz):  $\delta$  9.46 (s, 1H), 9.27 (s, 1H), 7.79 – 7.72 (m, 2H), 7.64 – 7.53 (m, 2H), 7.42 – 7.36 (m, 2H), 7.33 – 7.28 (m, 2H), 5.73 (d,  $J$  = 8.1 Hz, 1H), 4.53 – 4.35 (m, 3H), 4.30 – 4.20 (m, 3H), 4.16 – 4.09 (m, 2H), 4.02 – 3.88 (m, 2H), 3.75 (s, 3H), 1.92 – 1.65 (m, 4H), 1.34 – 1.24 (m, 6H).

**Figure S2.** <sup>1</sup>H NMR spectrum of 1C.

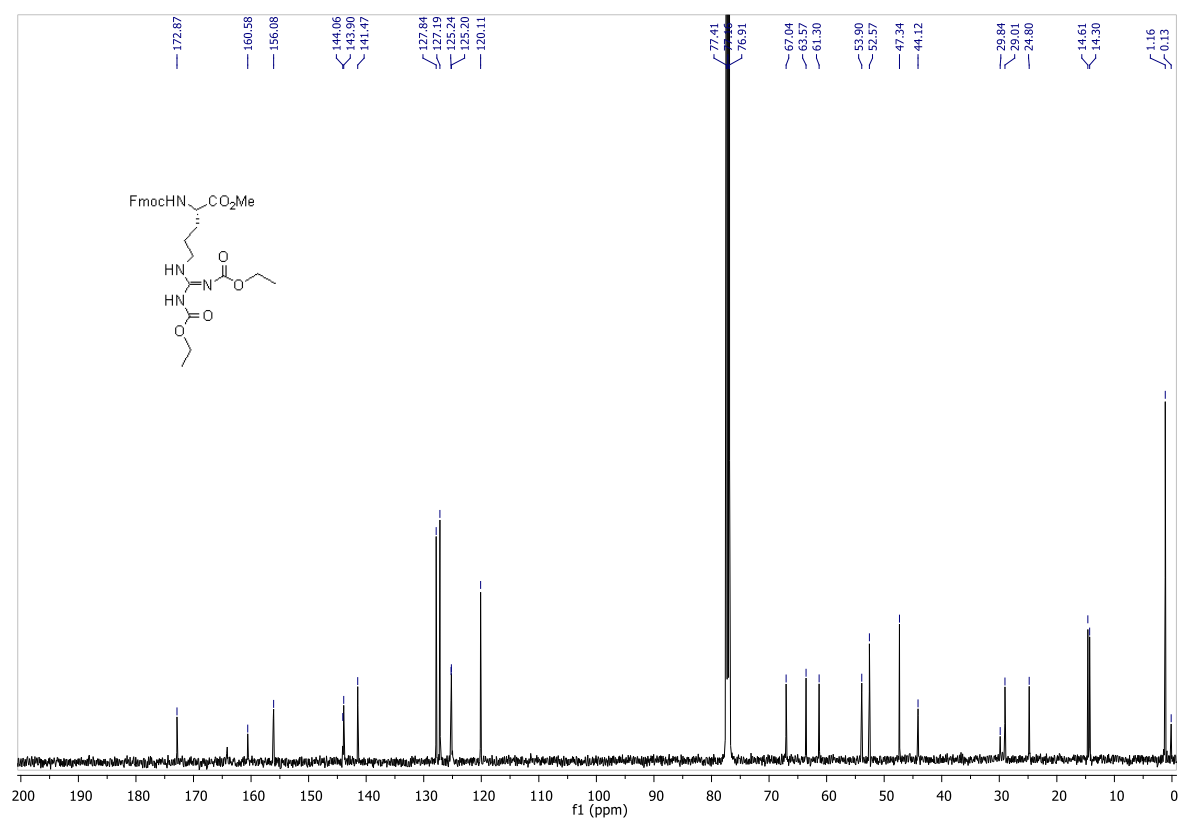

<sup>13</sup>C NMR (CDCl<sub>3</sub>, 126 MHz): δ 160.6, 156.1, 144.1, 143.9, 141.5, 127.8, 127.2, 125.2, 120.1, 63.6, 61.3, 53.9, 52.6, 47.3, 44.1, 29.0, 24.8, 14.6, 14.3.

**Figure S3.** <sup>13</sup>C NMR spectrum of 1C.

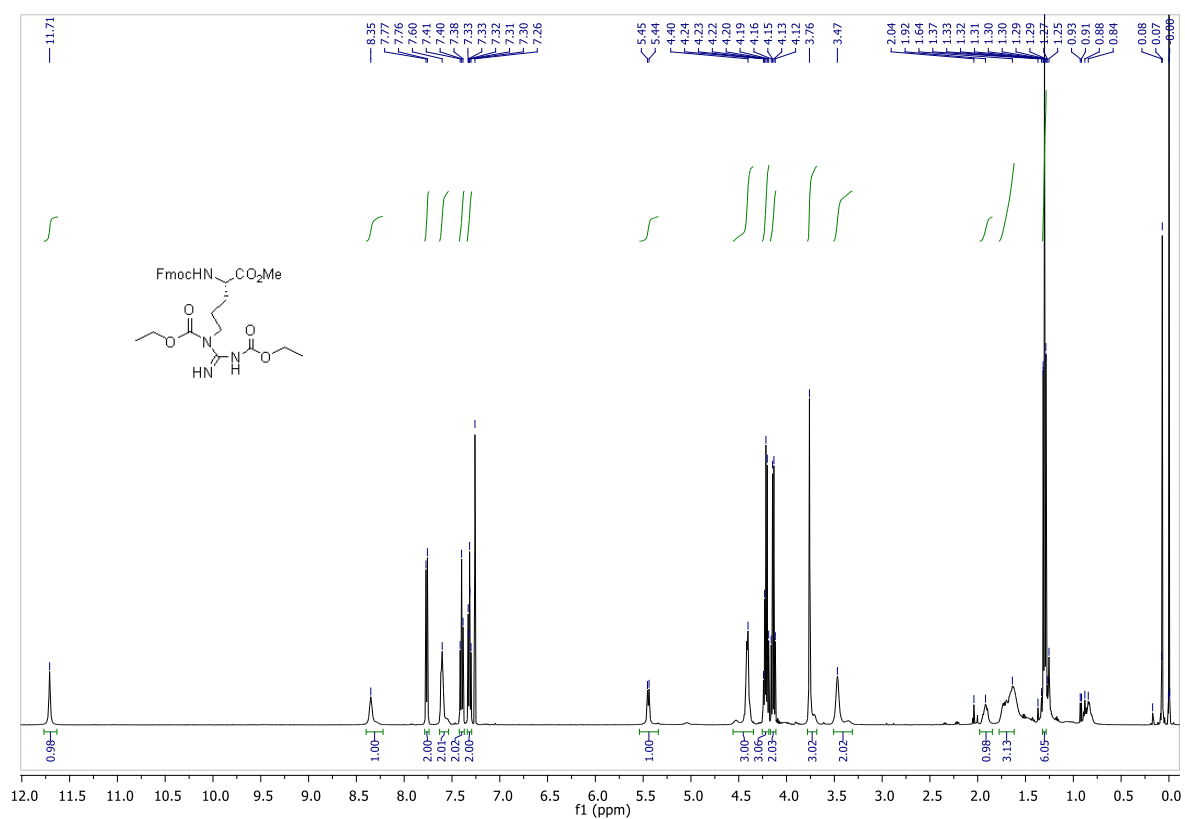

$^1\text{H}$  NMR ( $\text{CDCl}_3$ , 500 MHz):  $\delta$  11.71 (s, 1H), 8.53 (s, 1H), 7.79 – 7.74 (m, 2H), 7.63 – 7.54 (m, 2H), 7.42 – 7.37 (m, 2H), 7.34 – 7.29 (m, 2H), 5.45 (d,  $J$  = 8.1 Hz, 1H), 4.56 – 4.35 (m, 3H), 4.25 – 4.18 (m, 3H), 4.17 – 4.11 (m, 2H), 3.76 (s, 3H), 3.51 – 3.31 (m, 2H), 1.98 – 1.85 (m, 1H), 1.78 – 1.62 (m, 3H), 1.32 – 1.28 (m, 6H).

**Figure S4.**  $^1\text{H}$  NMR spectrum of **1D**.

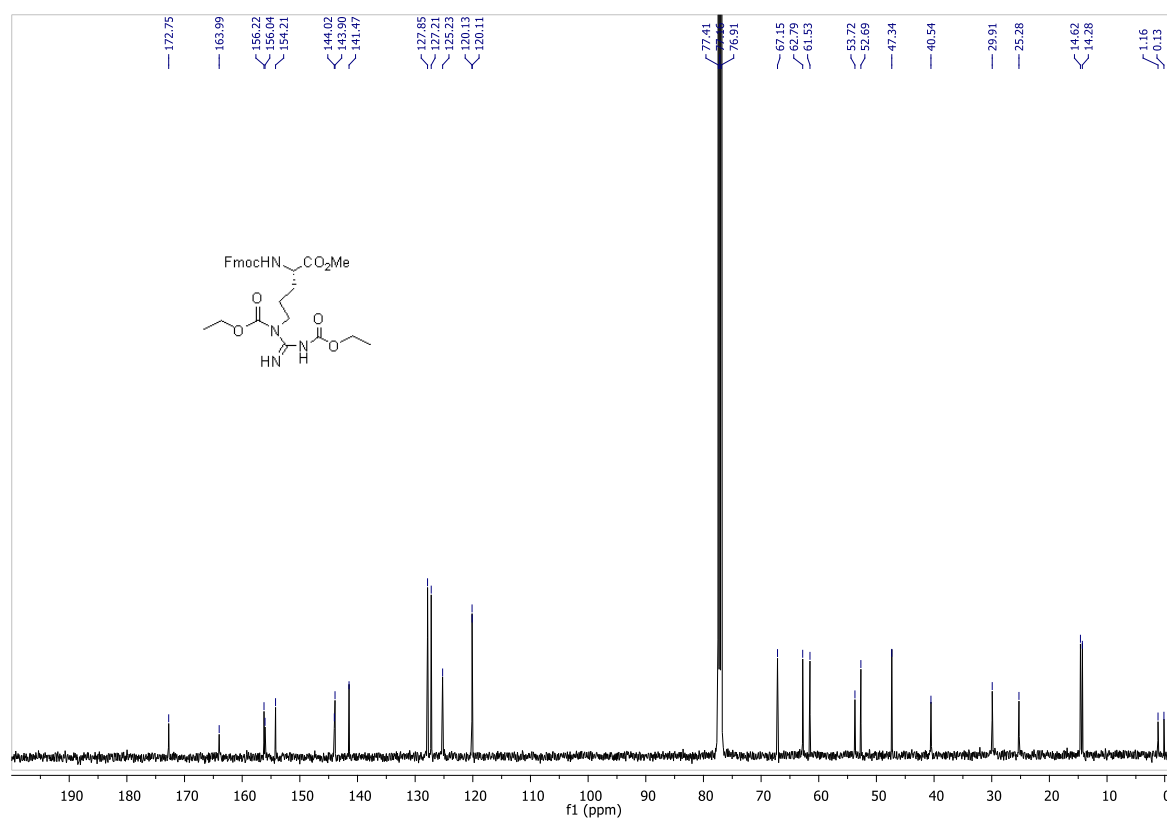

<sup>13</sup>C NMR (CDCl<sub>3</sub>, 126 MHz):  $\delta$  172.8, 163.9, 156.2, 156.0, 154.2, 144.0, 143.9, 141.5, 127.9, 127.2, 125.2, 120.1, 67.2, 62.8, 61.5, 53.7, 52.7, 47.3, 40.5, 29.9, 25.3, 14.6, 14.3.

**Figure S5.** <sup>13</sup>C NMR spectrum of **1D**.

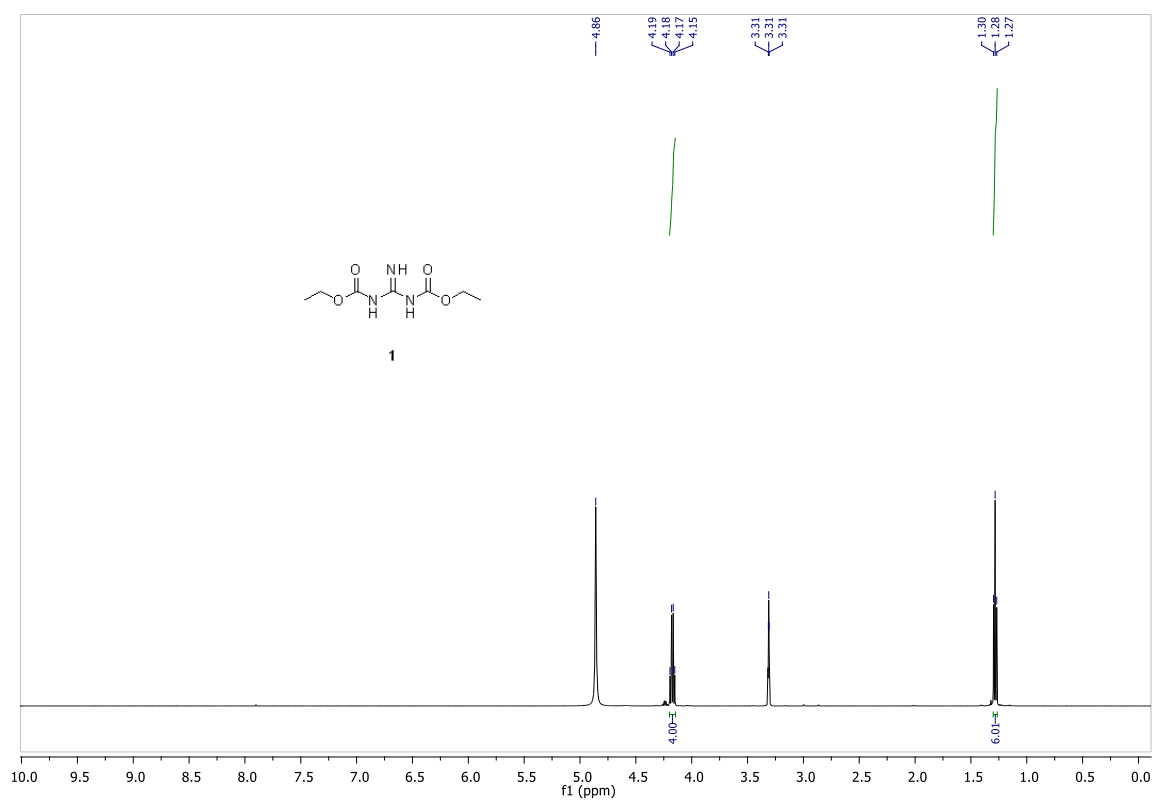

**Figure S6.** <sup>1</sup>H NMR spectrum of **1**.

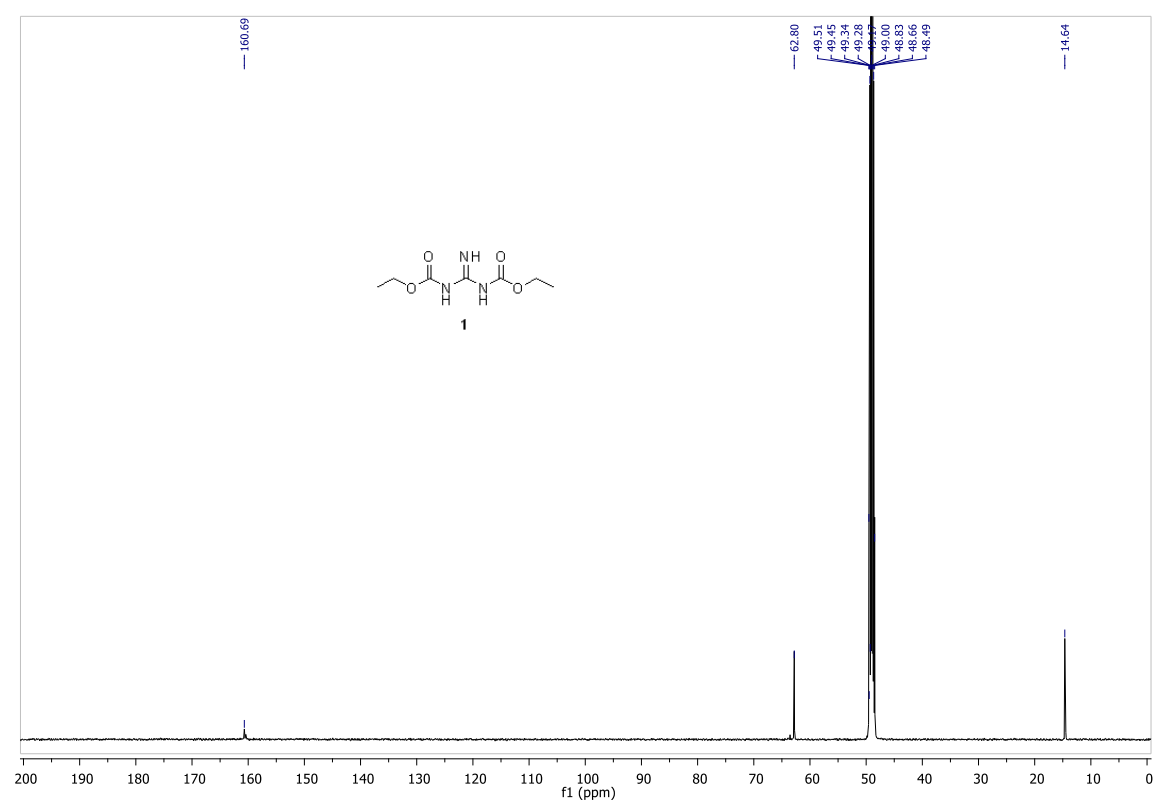

**Figure S7.** <sup>13</sup>C NMR spectrum of **1**.

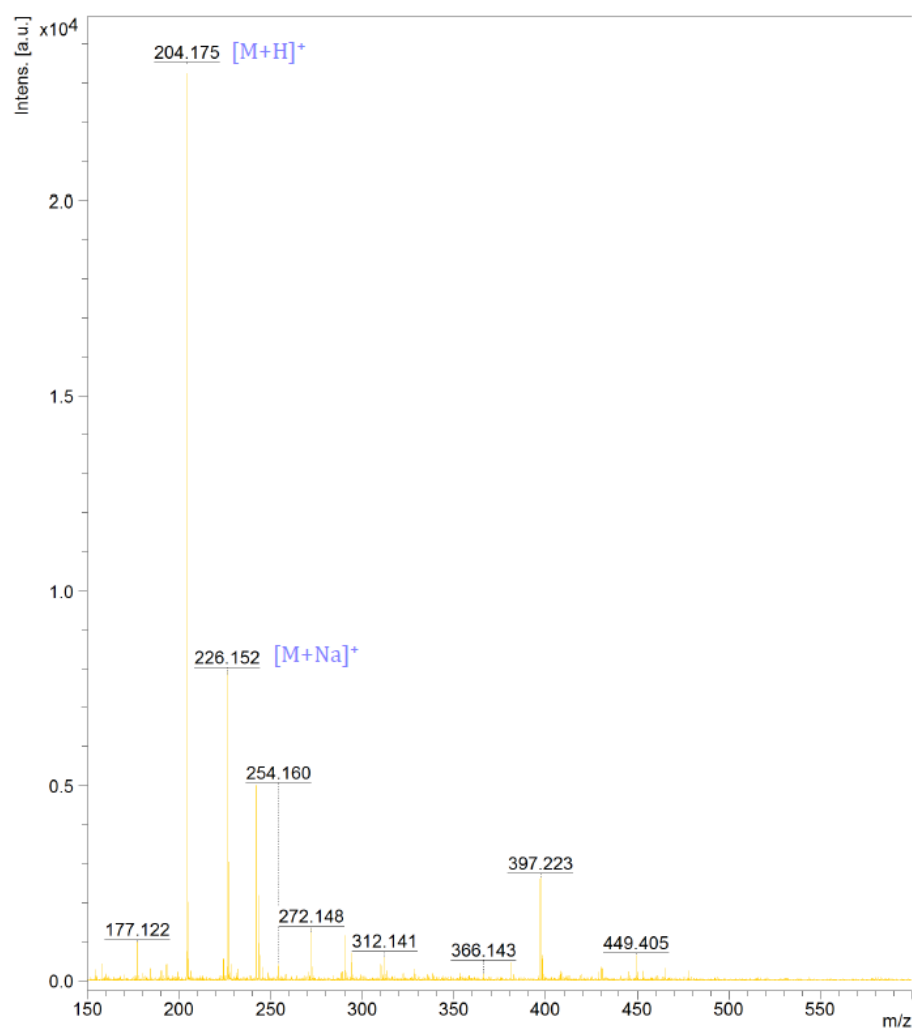

**Figure S8.** MALDI-MS spectrum of **1**.

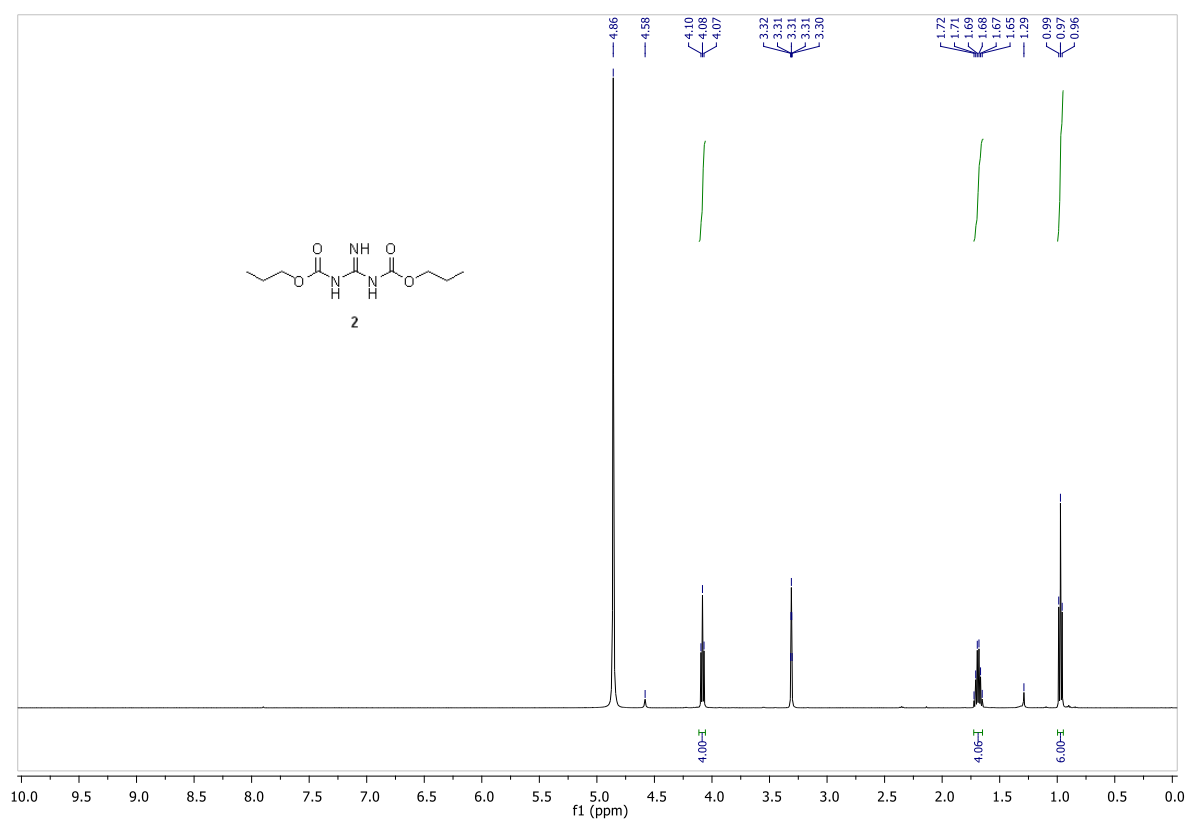

**Figure S9.** <sup>1</sup>H NMR spectrum of **2**.

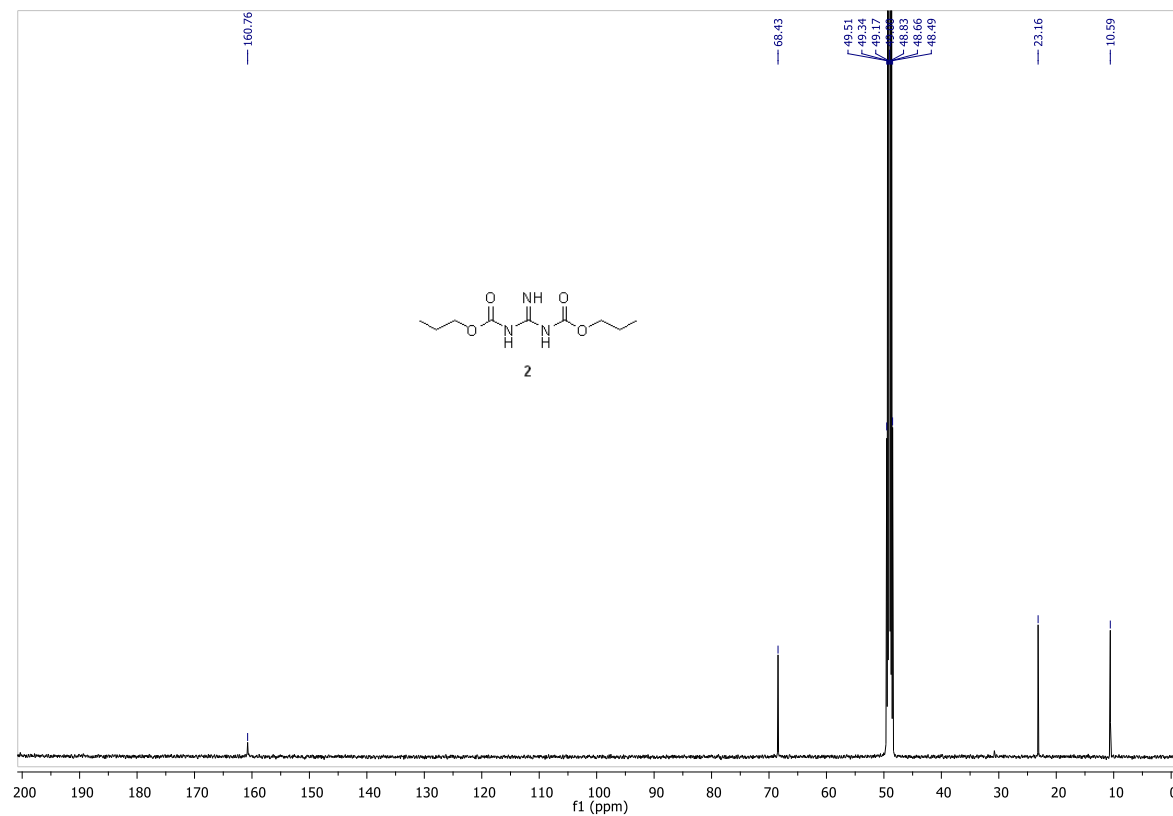

**Figure S10.** <sup>13</sup>C NMR spectrum of **2**.

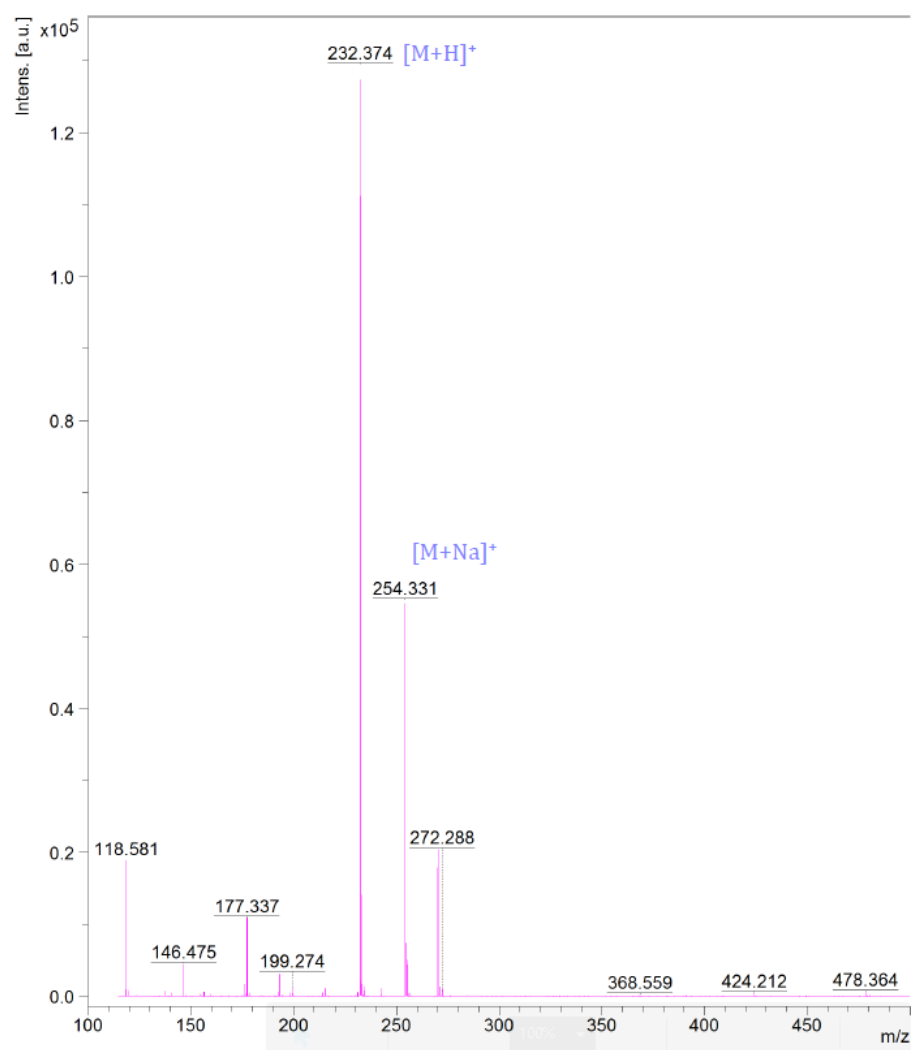

**Figure S11.** MALDI-MS spectrum of **2**.

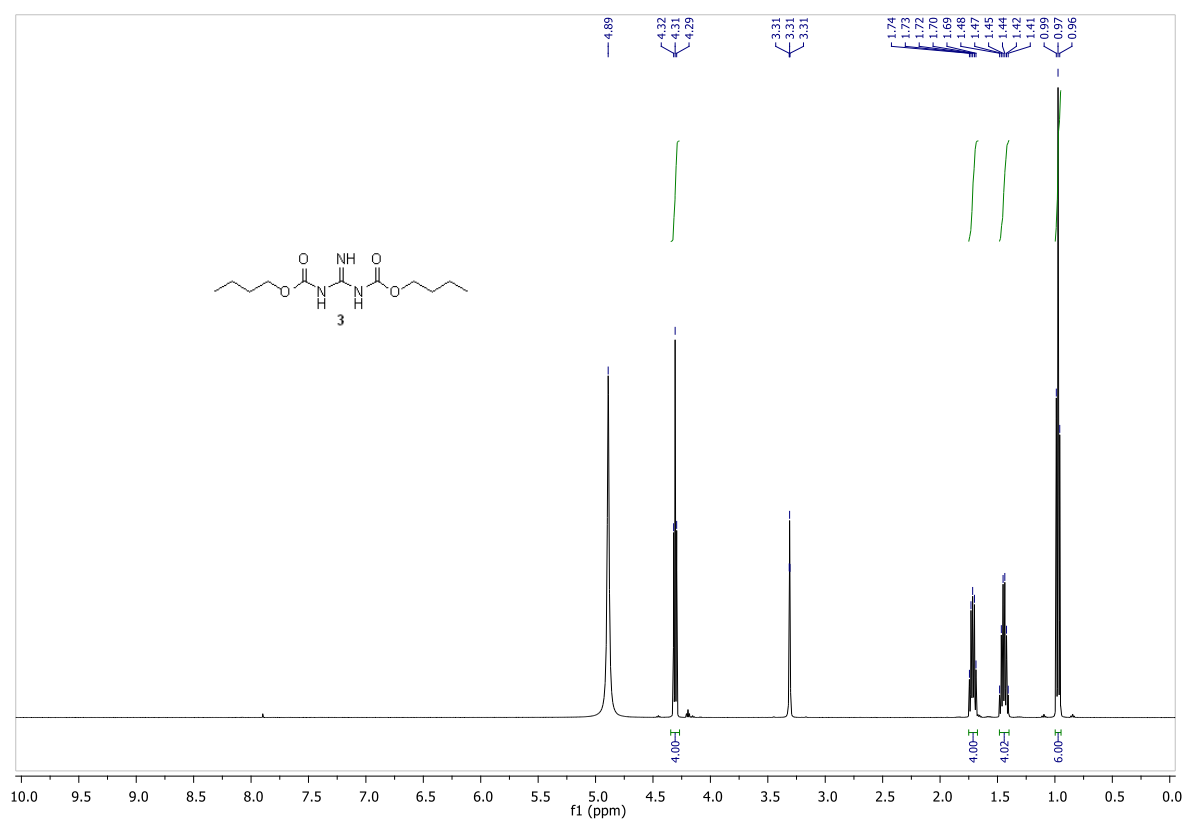

**Figure S12.**  $^1\text{H}$  NMR spectrum of **3**.

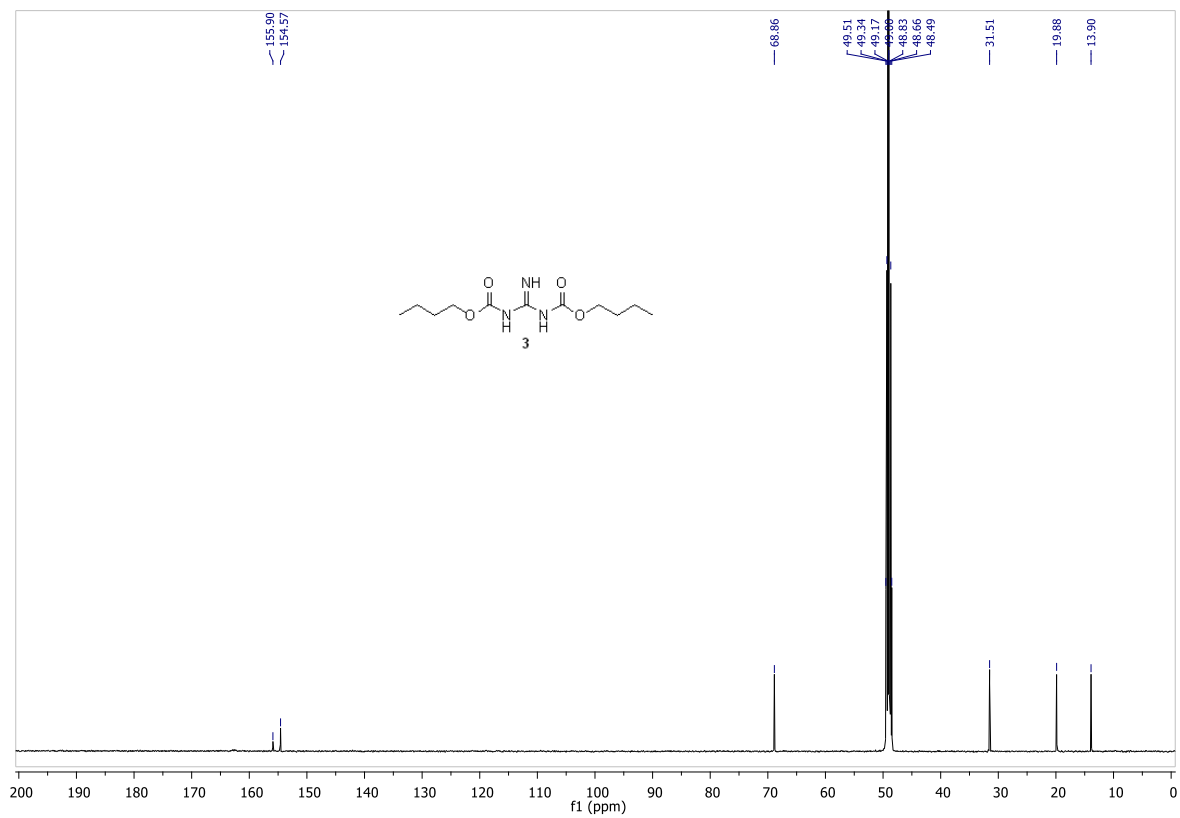

**Figure S13.**  $^{13}\text{C}$  NMR spectrum of **3**.

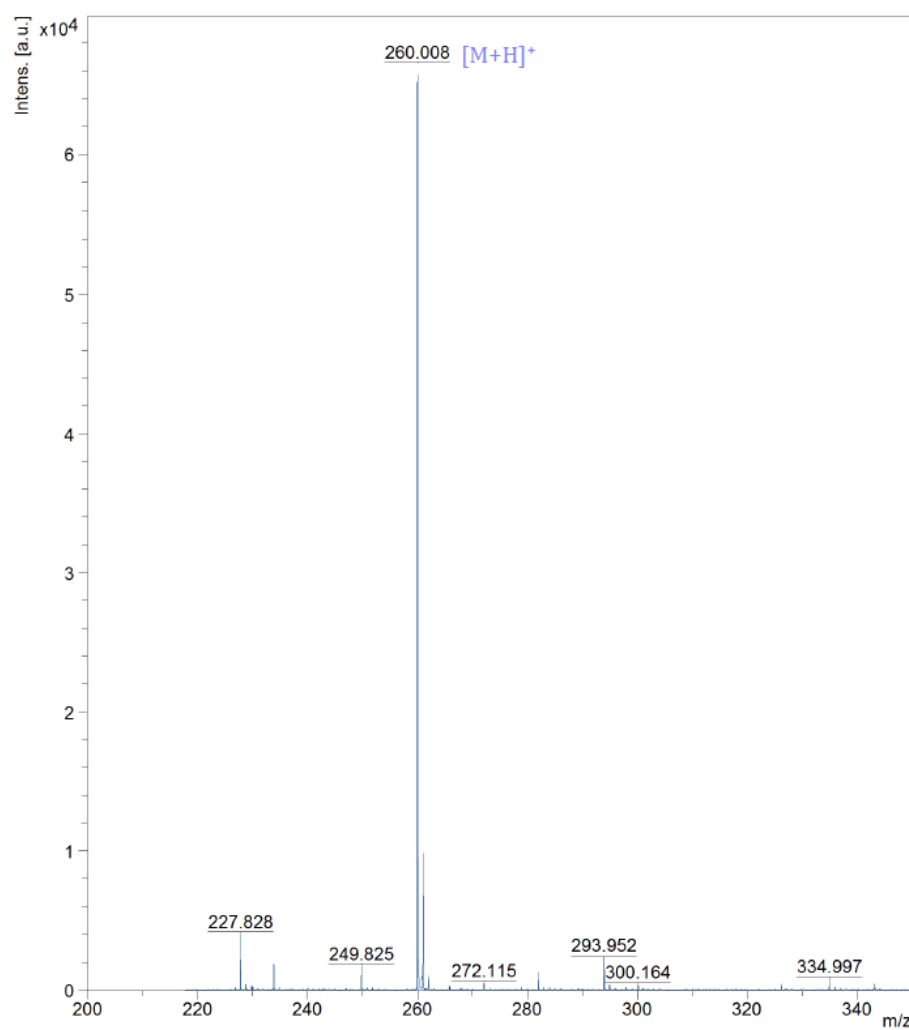

**Figure S14.** MALDI-MS spectrum of **3**.

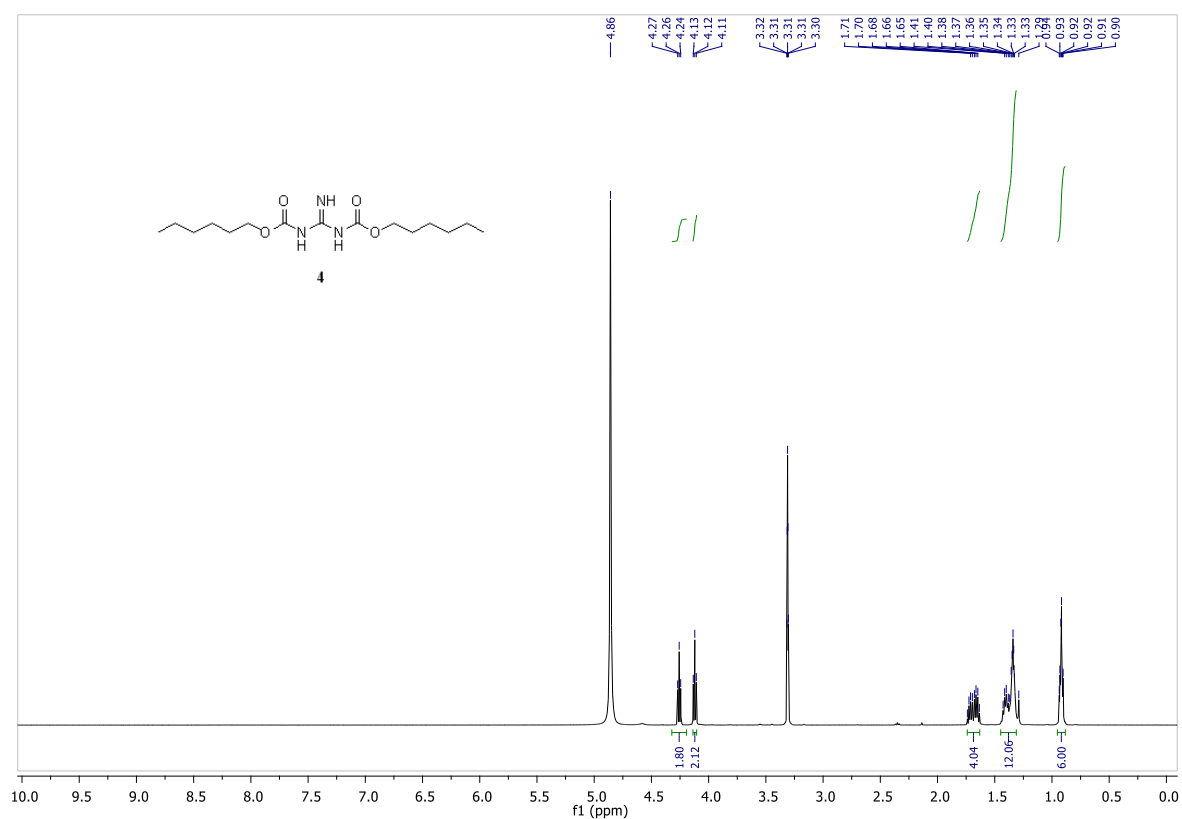

**Figure S15.** <sup>1</sup>H NMR spectrum of **4**.

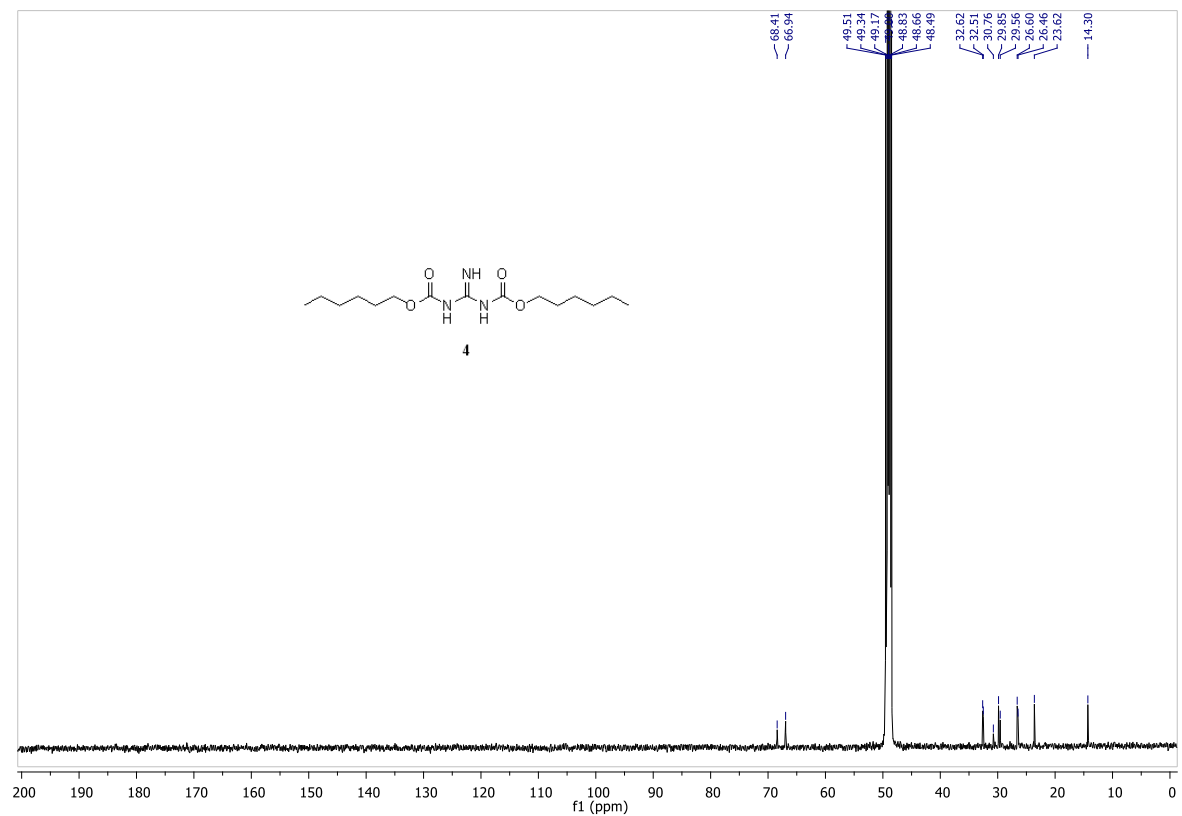

**Figure S16.** <sup>13</sup>C NMR spectrum of **4**.

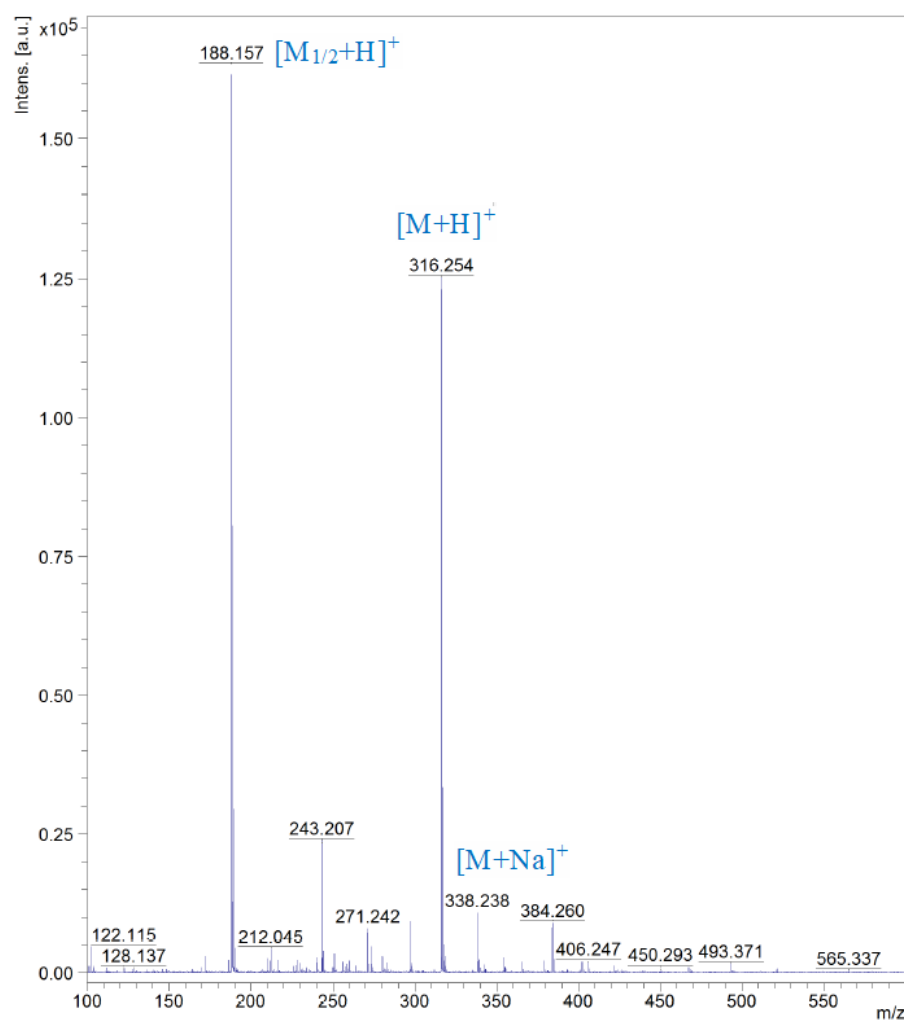

**Figure S17.** MALDI-MS spectrum of **4**.

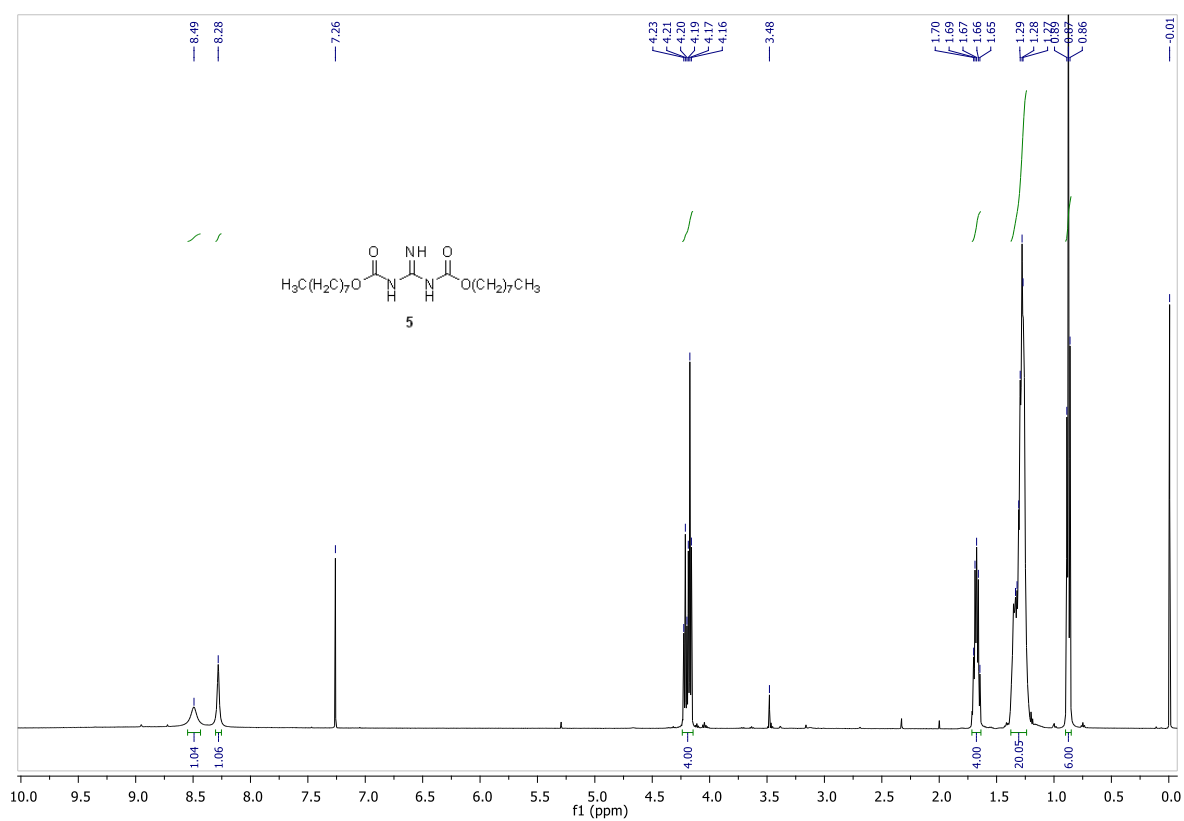

**Figure S18.** <sup>1</sup>H NMR spectrum of 5.

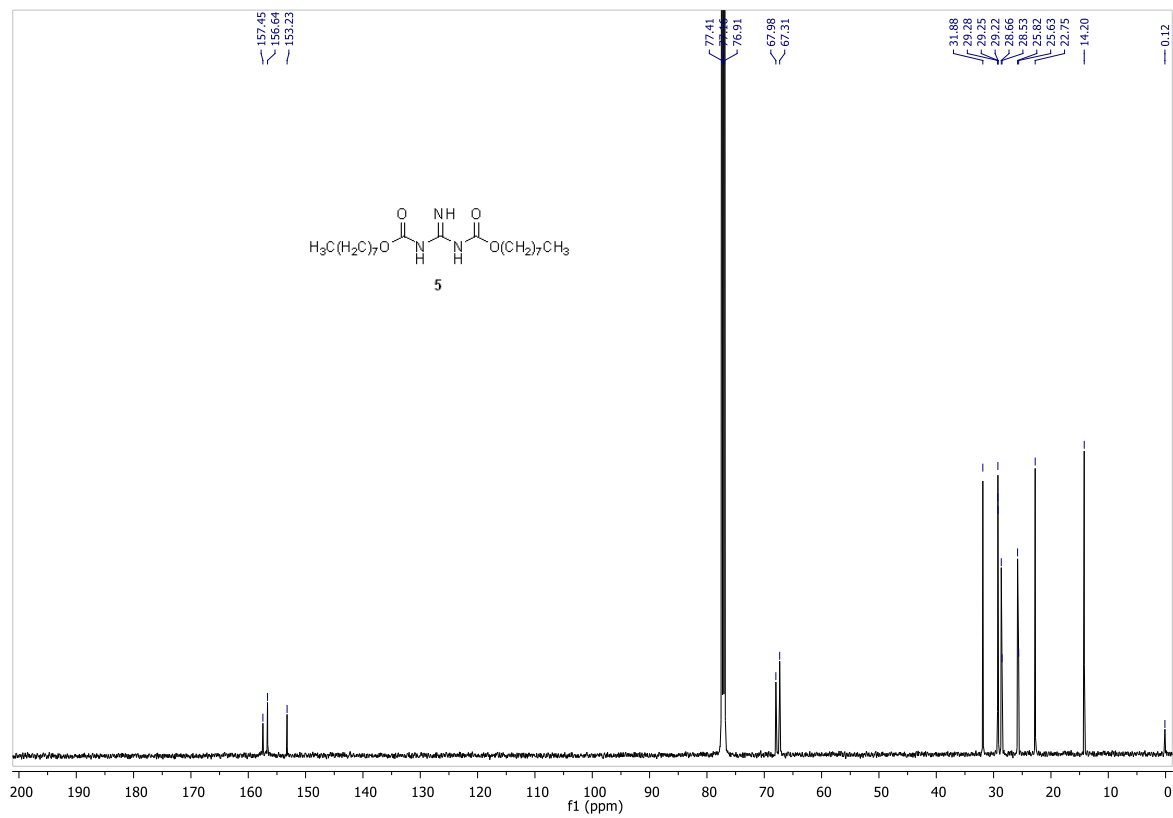

**Figure S19.** <sup>13</sup>C NMR spectrum of 5.

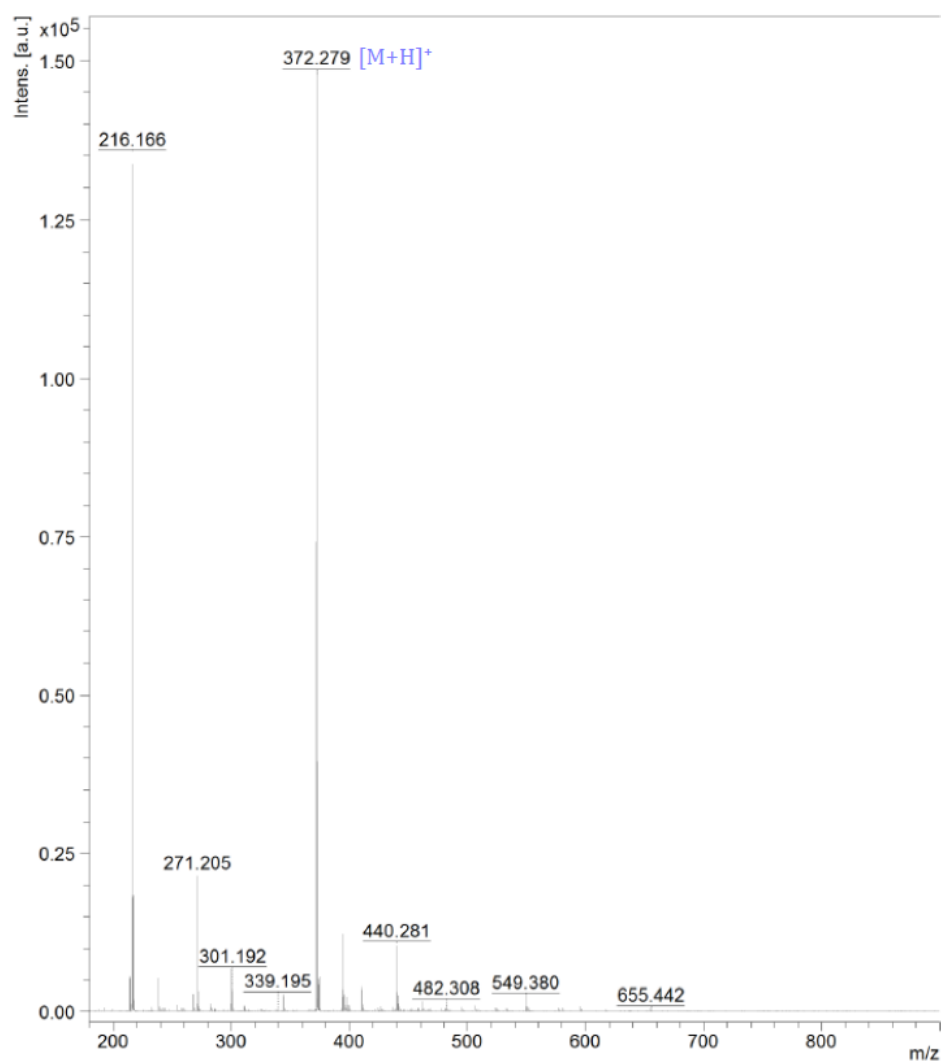

Figure S20. MALDI-MS spectrum of 5.

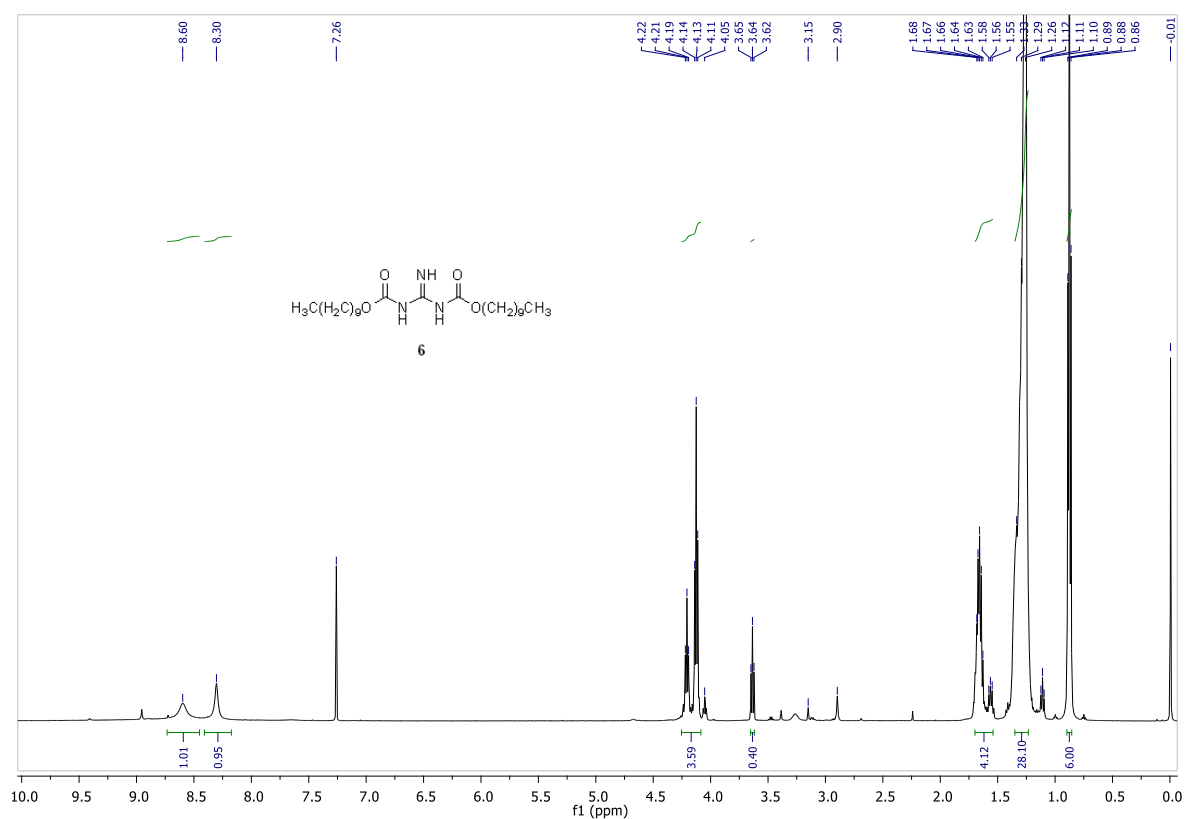

Figure S21. <sup>1</sup>H NMR spectrum of 6.

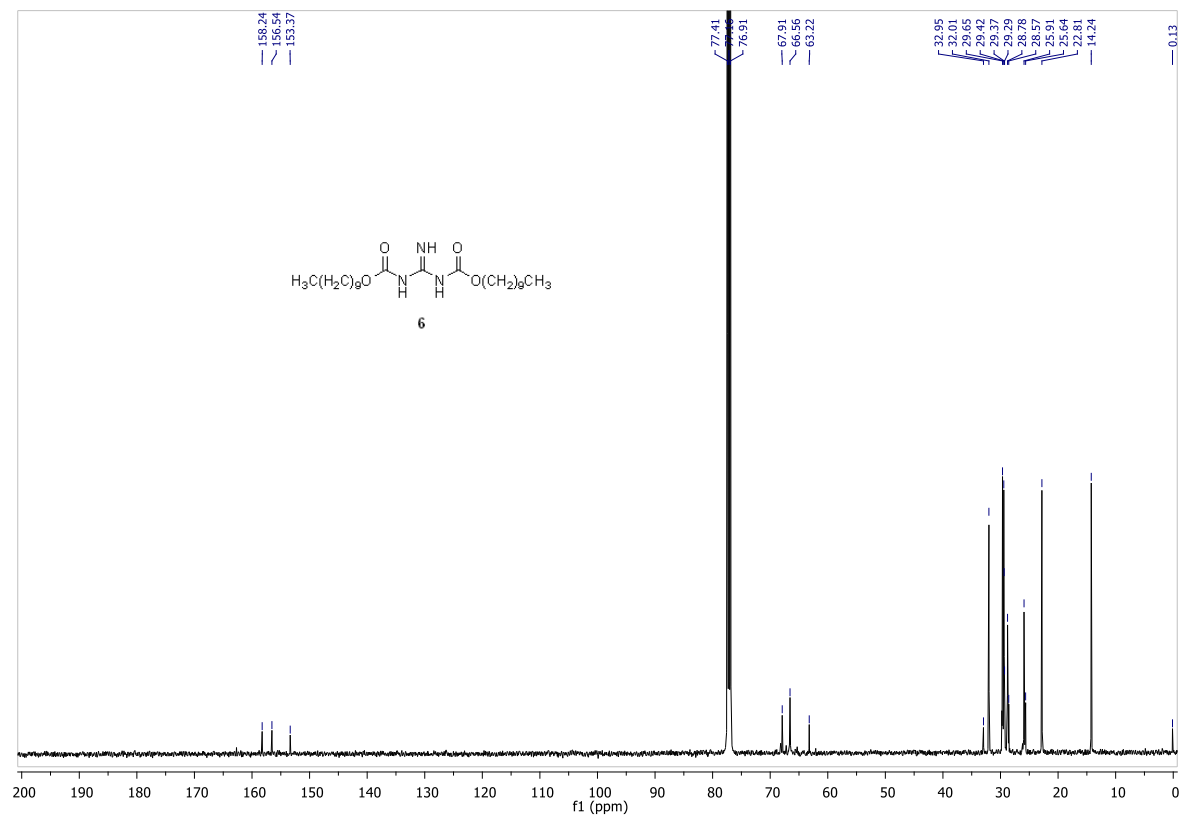

Figure S22. <sup>13</sup>C NMR spectrum of 6.

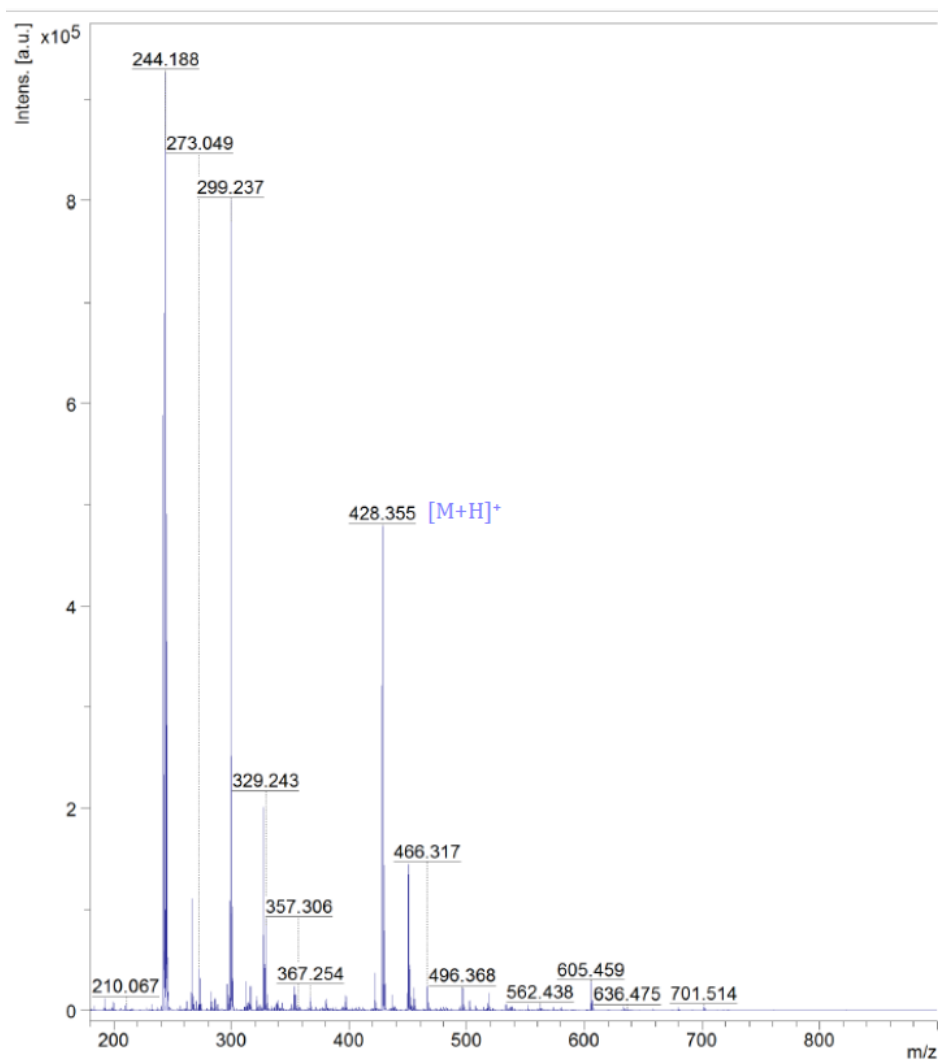

**Figure S23.** MALDI-MS spectrum of 6.

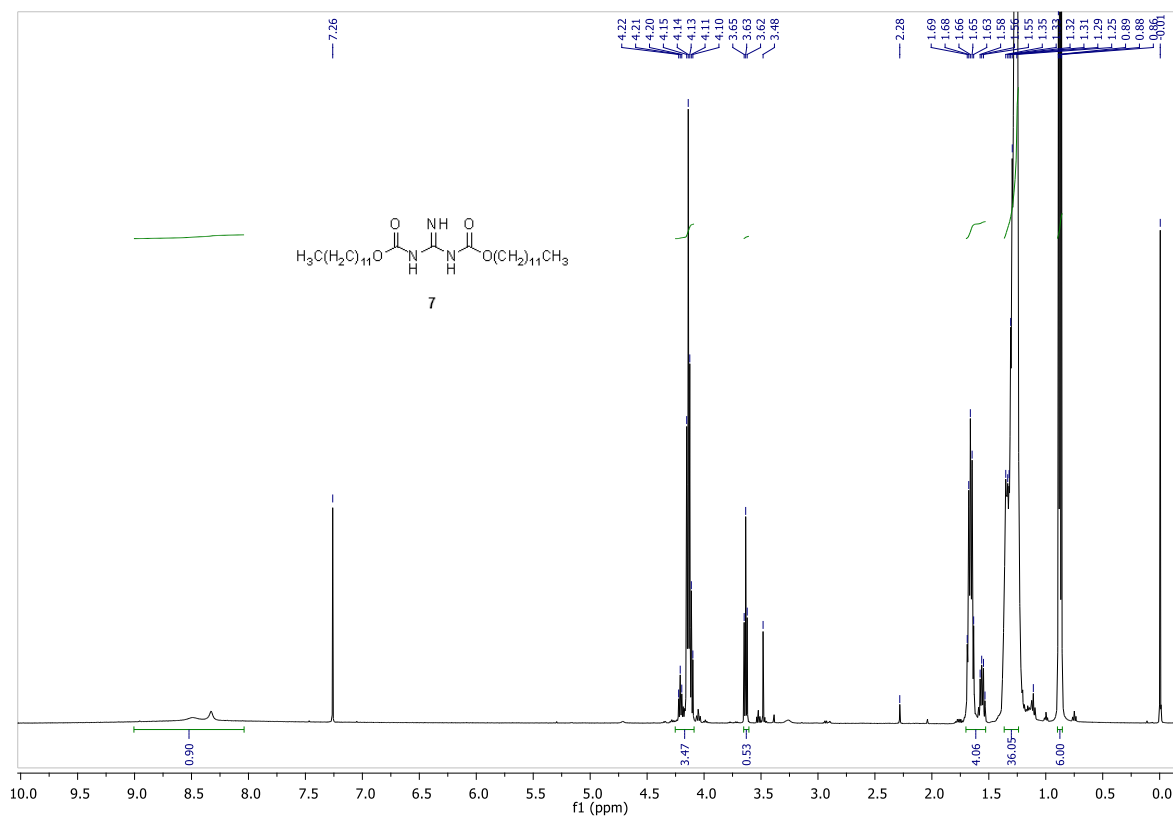

**Figure S24.** <sup>1</sup>H NMR spectrum of **7**.

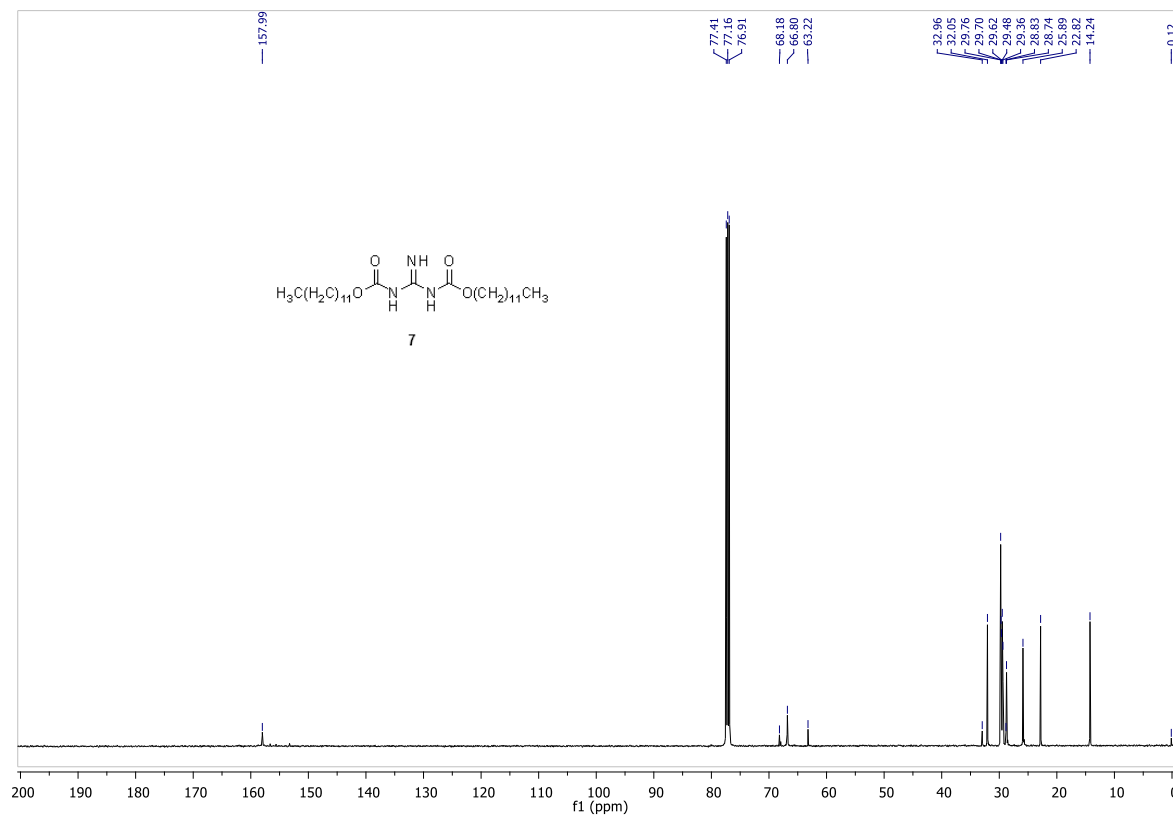

**Figure S25.** <sup>13</sup>C NMR spectrum of **7**.

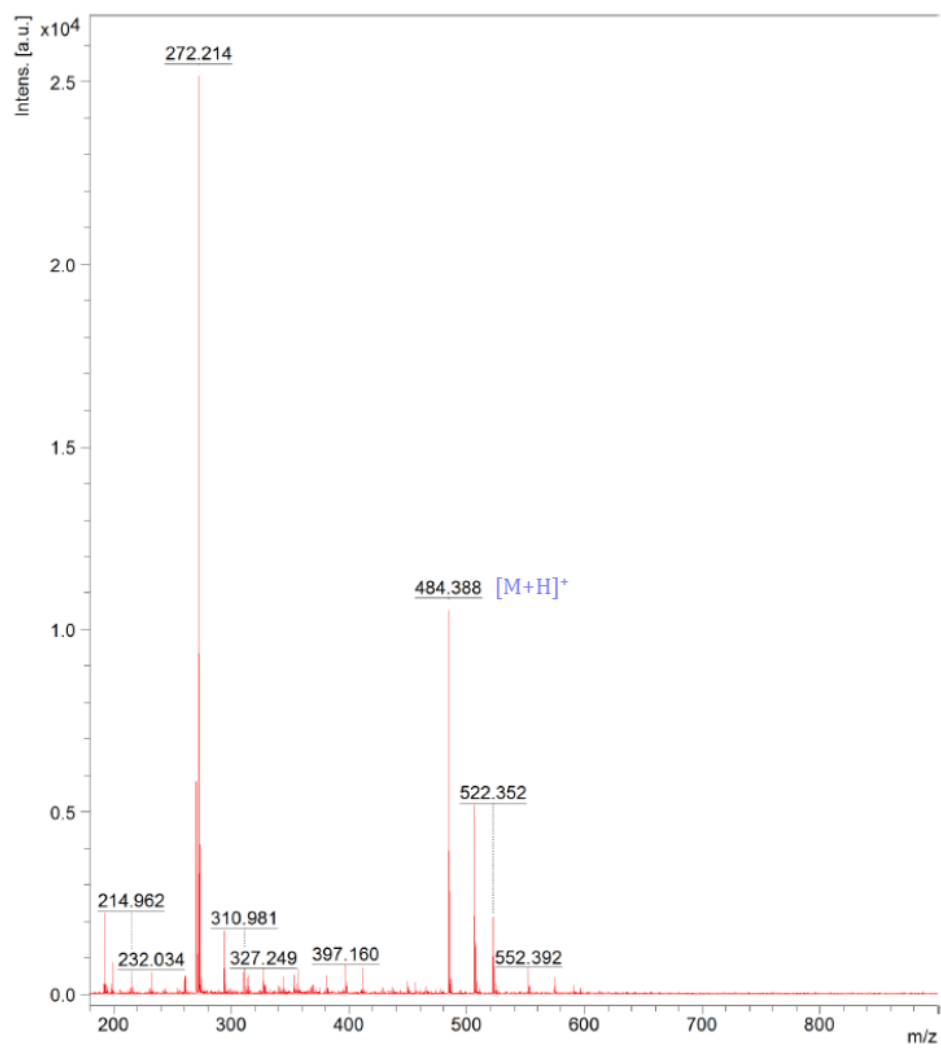

**Figure S26.** MALDI-MS spectrum of 7.

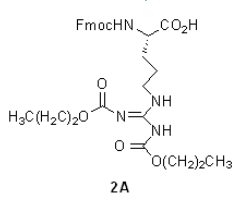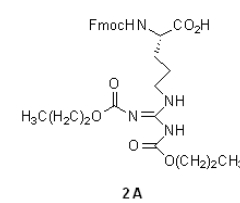

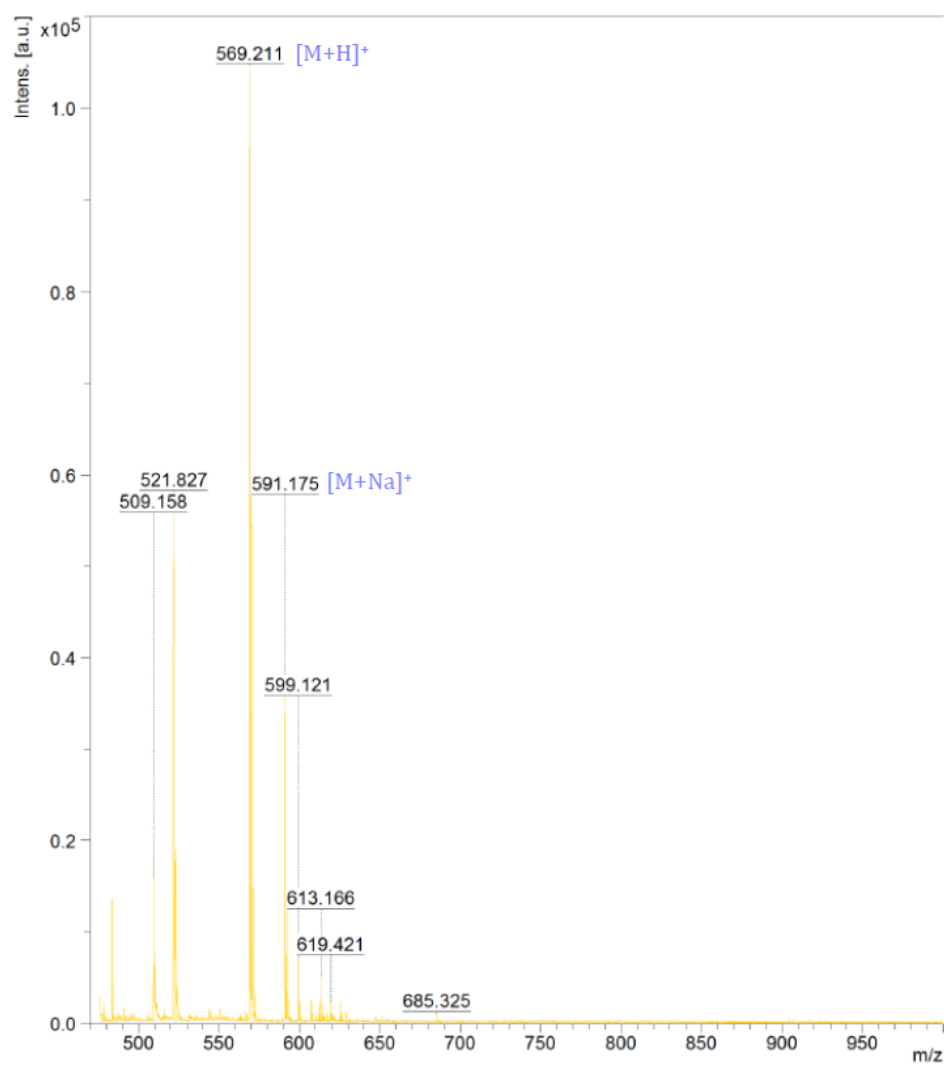

**Figure S29.** MALDI-MS spectrum of **2A**.

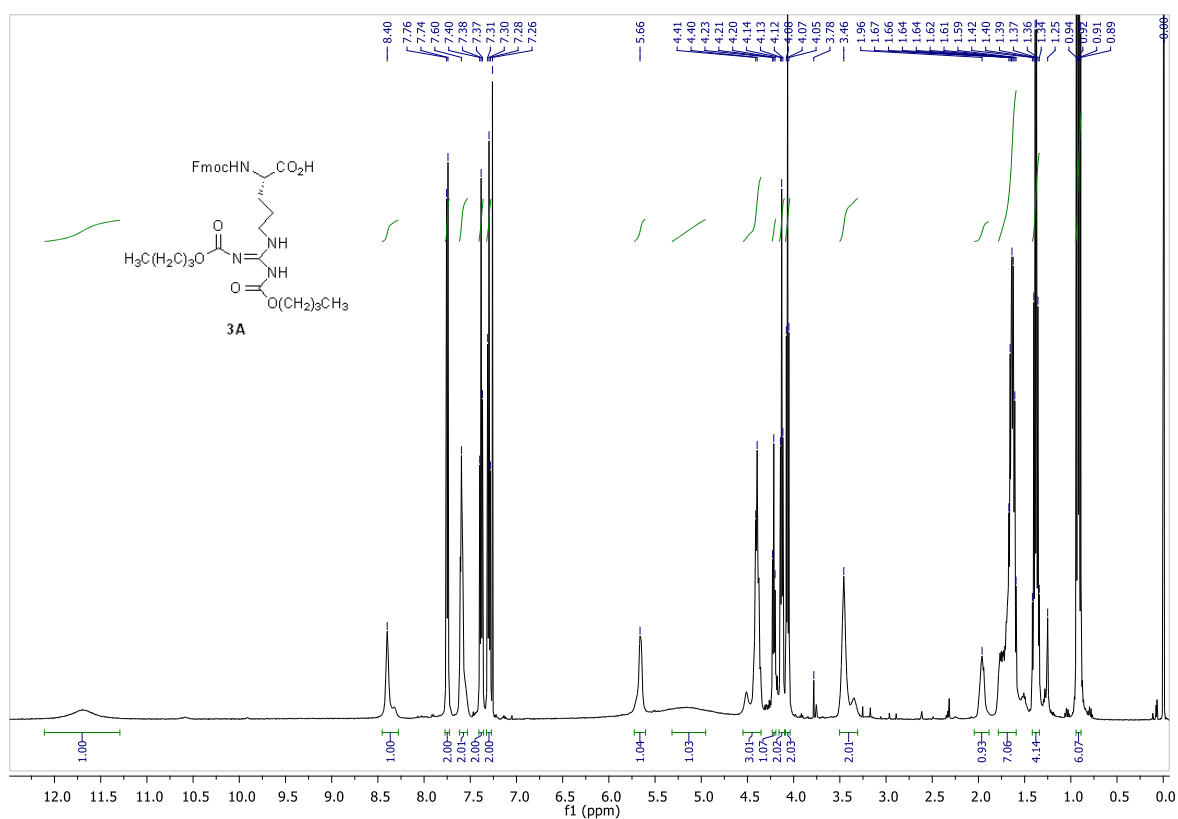

**Figure S30.** <sup>1</sup>H NMR spectrum of **3A**.

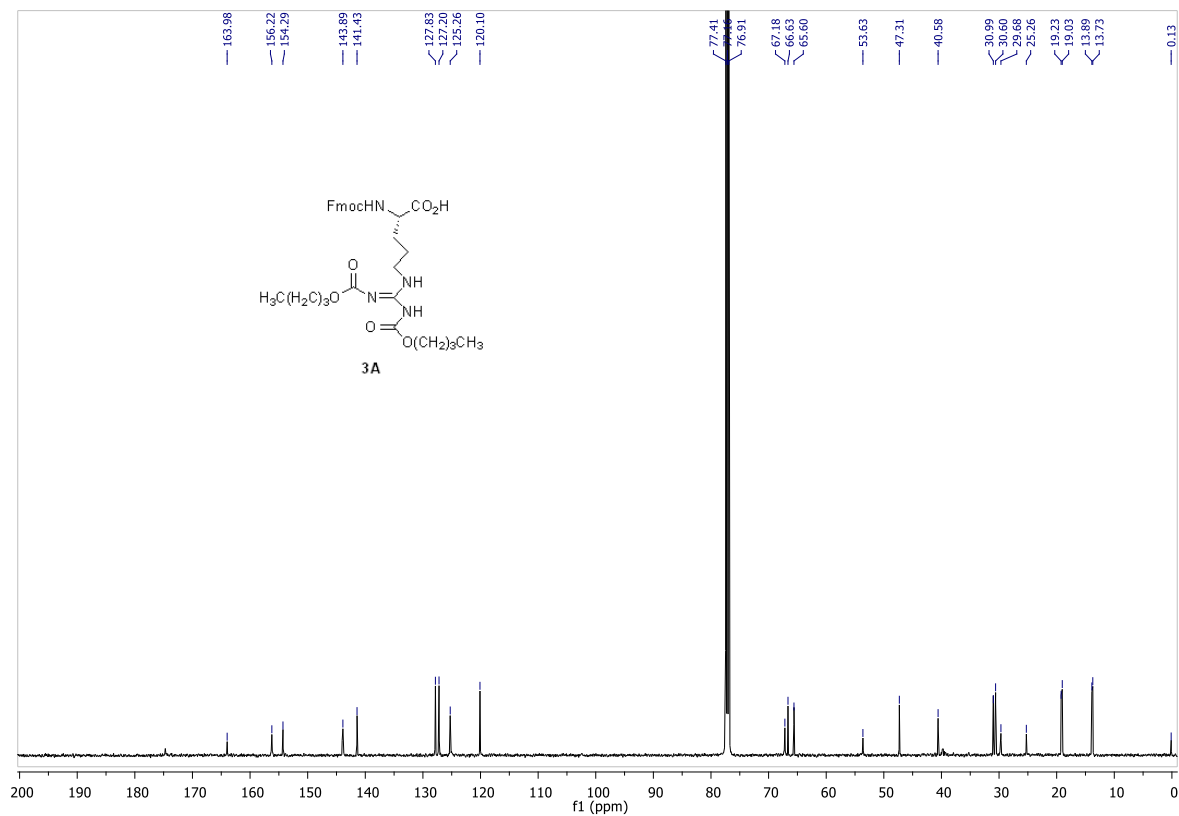

**Figure S31.** <sup>13</sup>C NMR spectrum of **3A**.

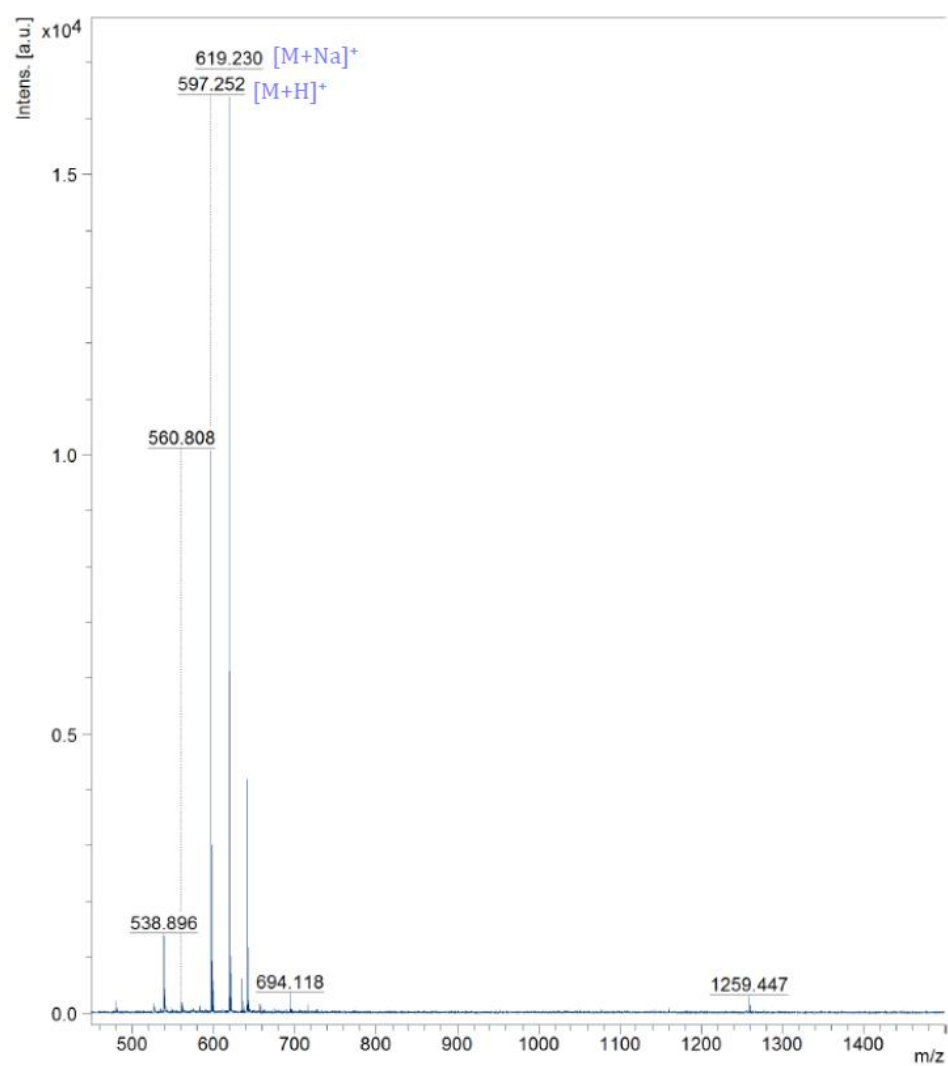

**Figure S32.** MALDI-MS spectrum of **3A**.

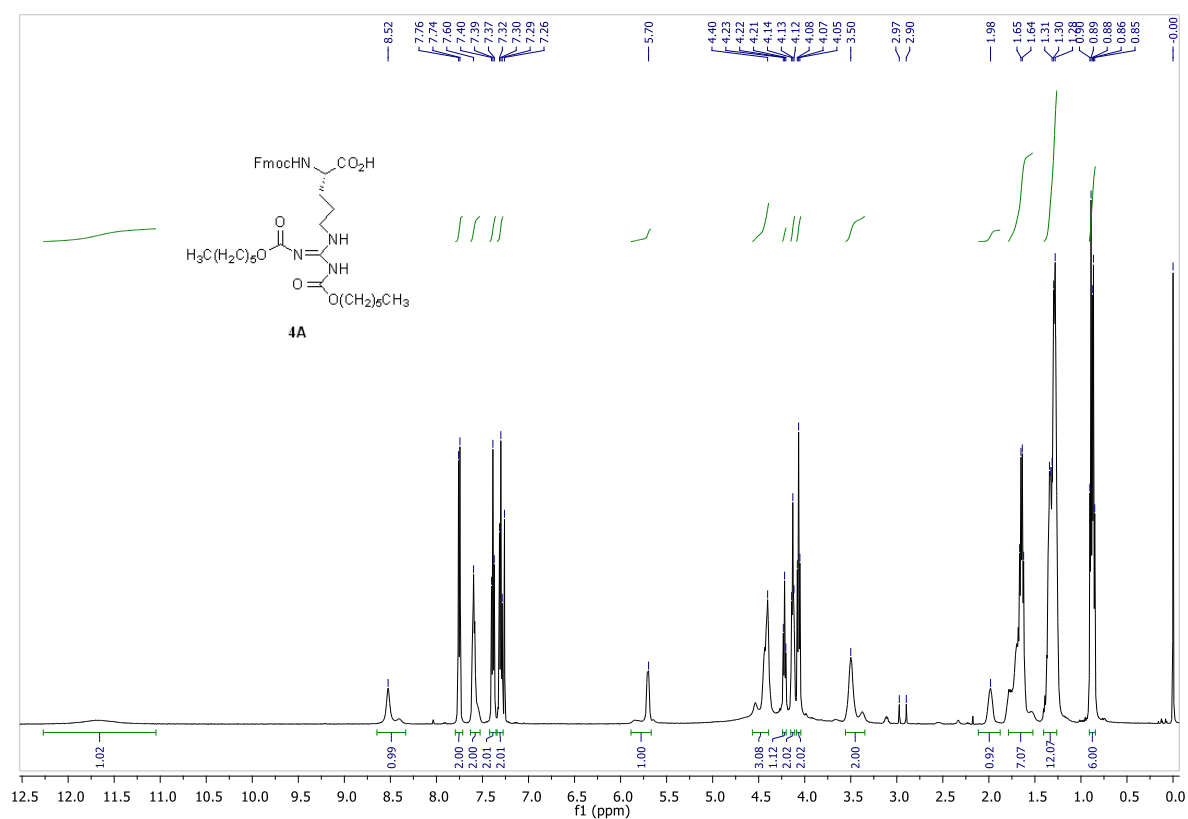

**Figure S33.**  $^1\text{H}$  NMR spectrum of **4A**.

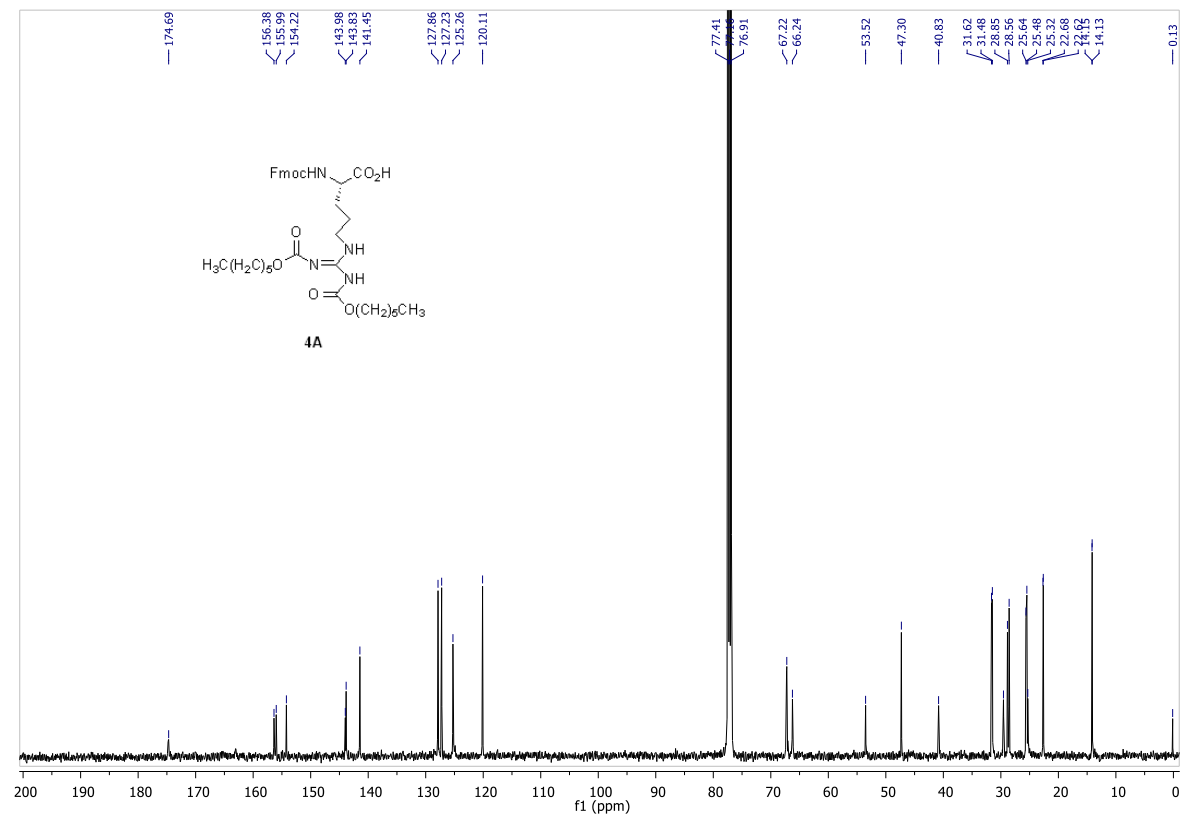

**Figure S34.**  $^{13}\text{C}$  NMR spectrum of **4A**.

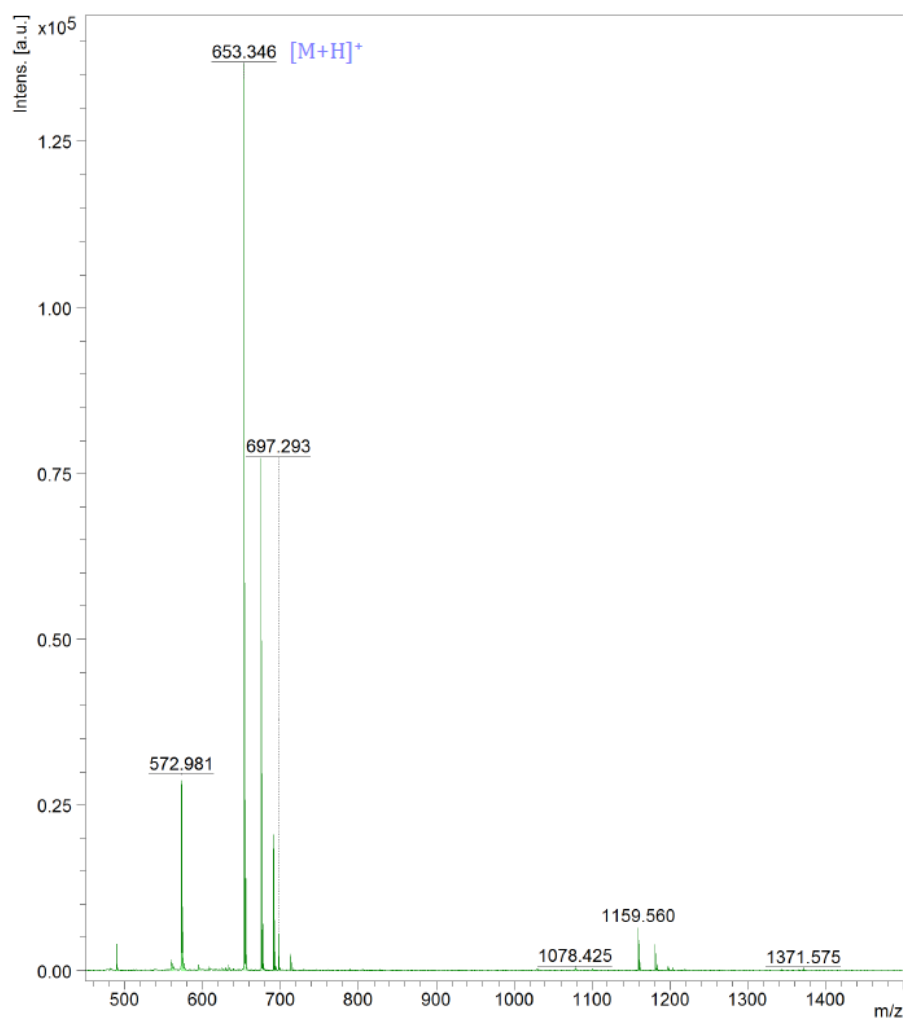

**Figure S35.** MALDI-MS spectrum of 4A.

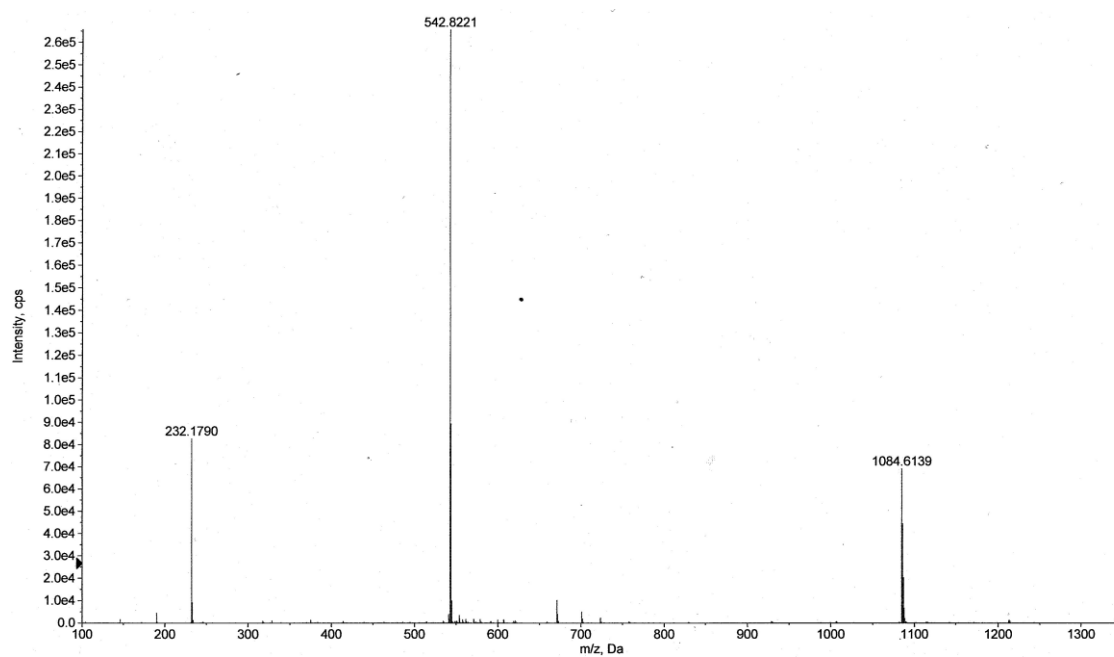

**Figure S36.** ESI-MS spectrum of AVP (232.1790 corresponds to H<sub>2</sub>N-Arg-Gly-NH<sub>2</sub> fragmentation part).



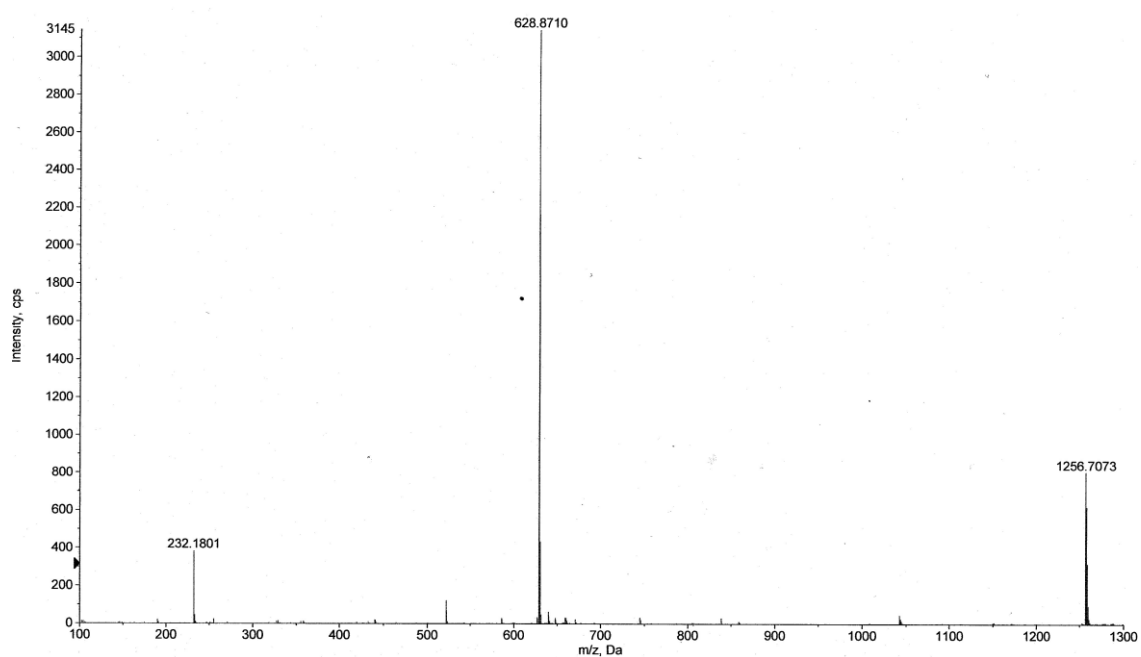

**Figure S39.** ESI-MS spectrum of **2B**.

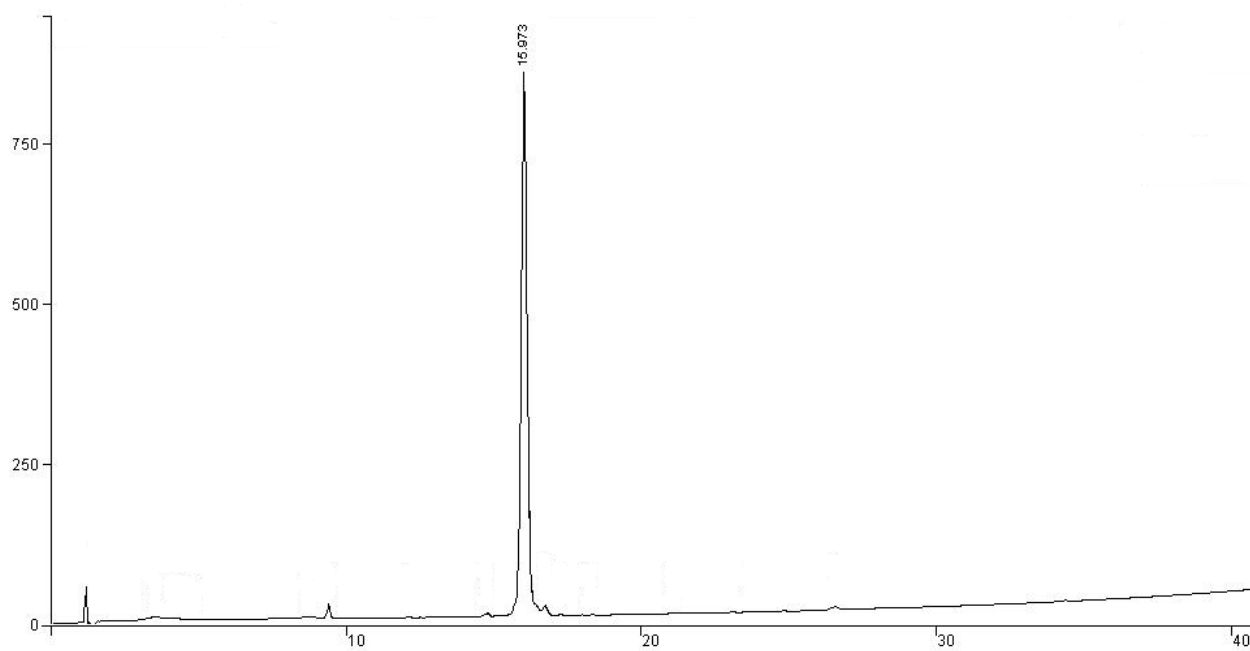

**Figure S40.** HPLC spectrum of **2B**.

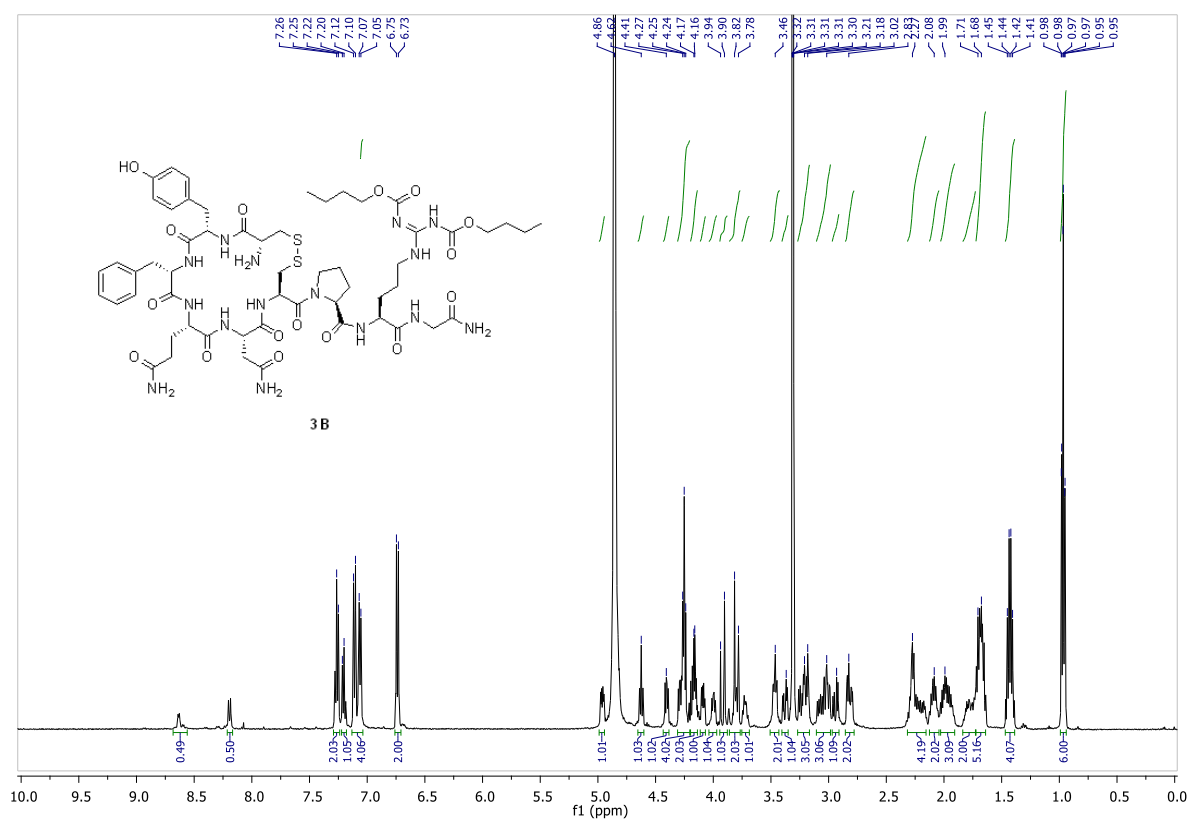

Figure S41. <sup>1</sup>H NMR spectrum of 3B.

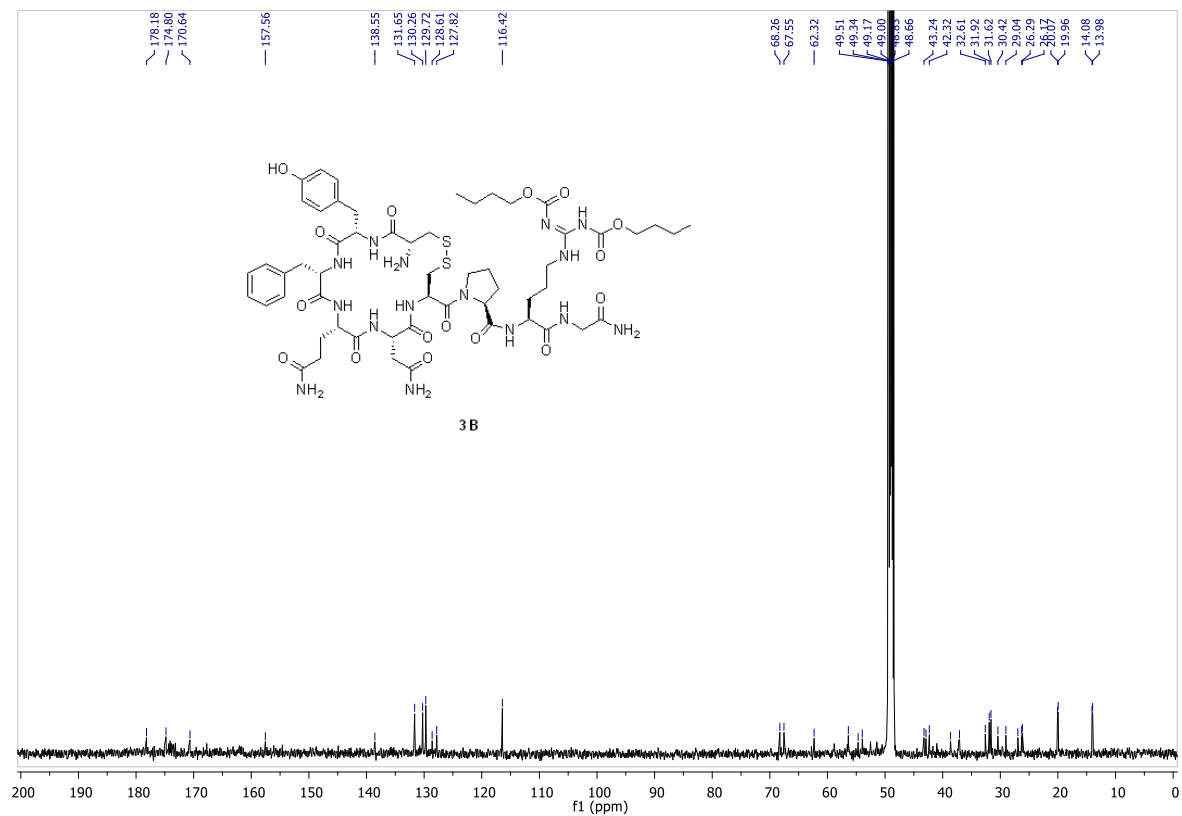

Figure S42. <sup>13</sup>C NMR spectrum of 3B.

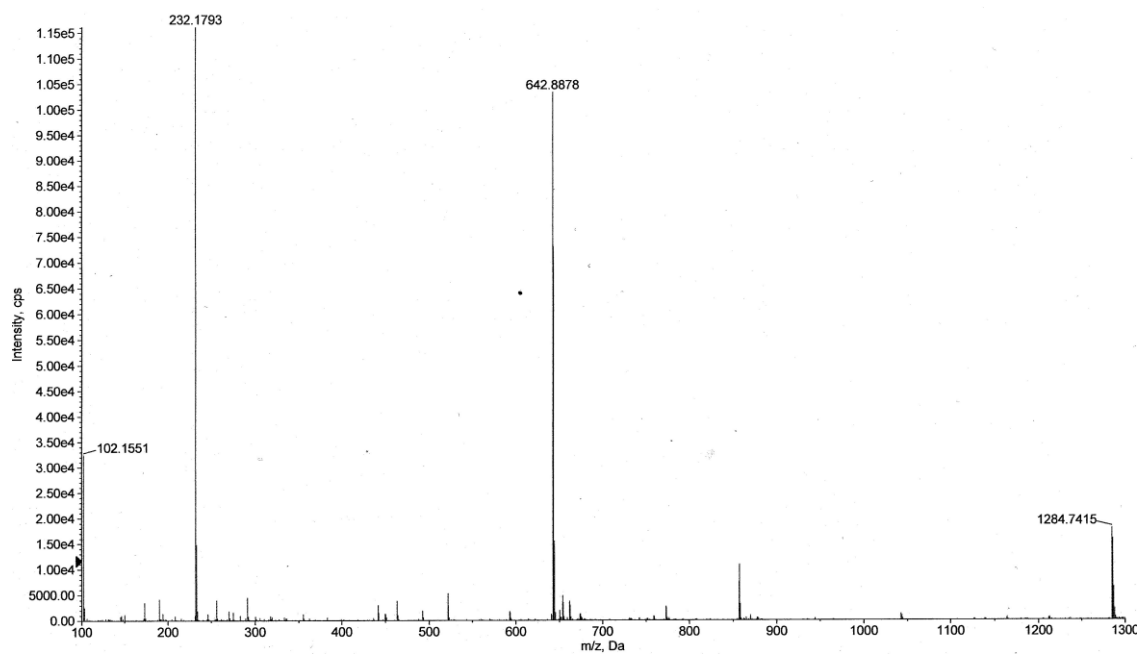

**Figure S43.** ESI-MS spectrum of **3B**.

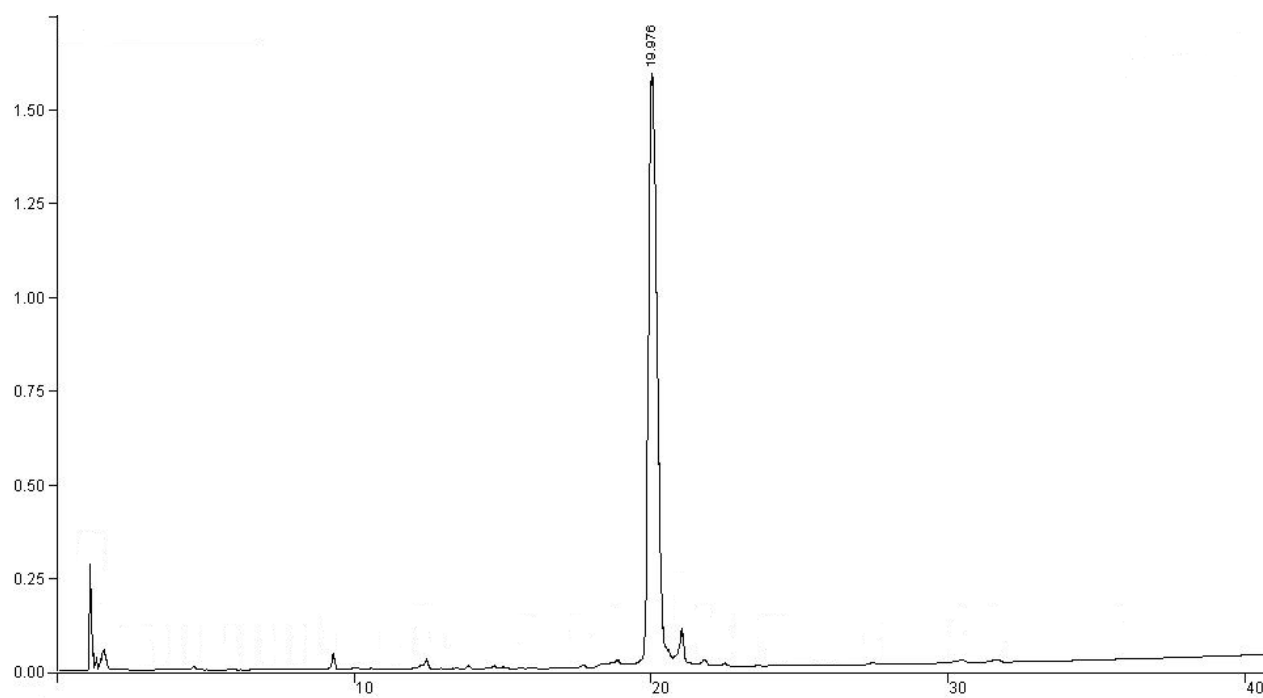

**Figure S44.** HPLC spectrum of **3B**.

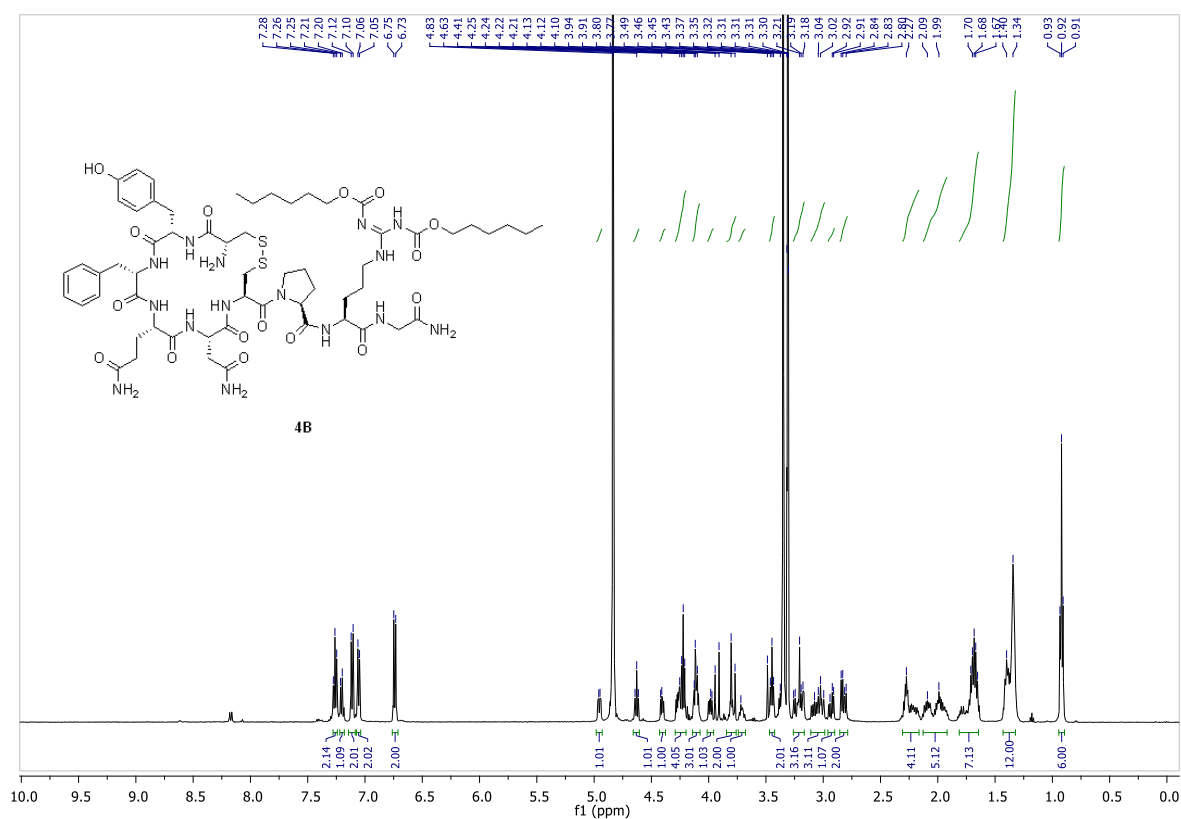

Figure S45. <sup>1</sup>H NMR spectrum of **4B**.

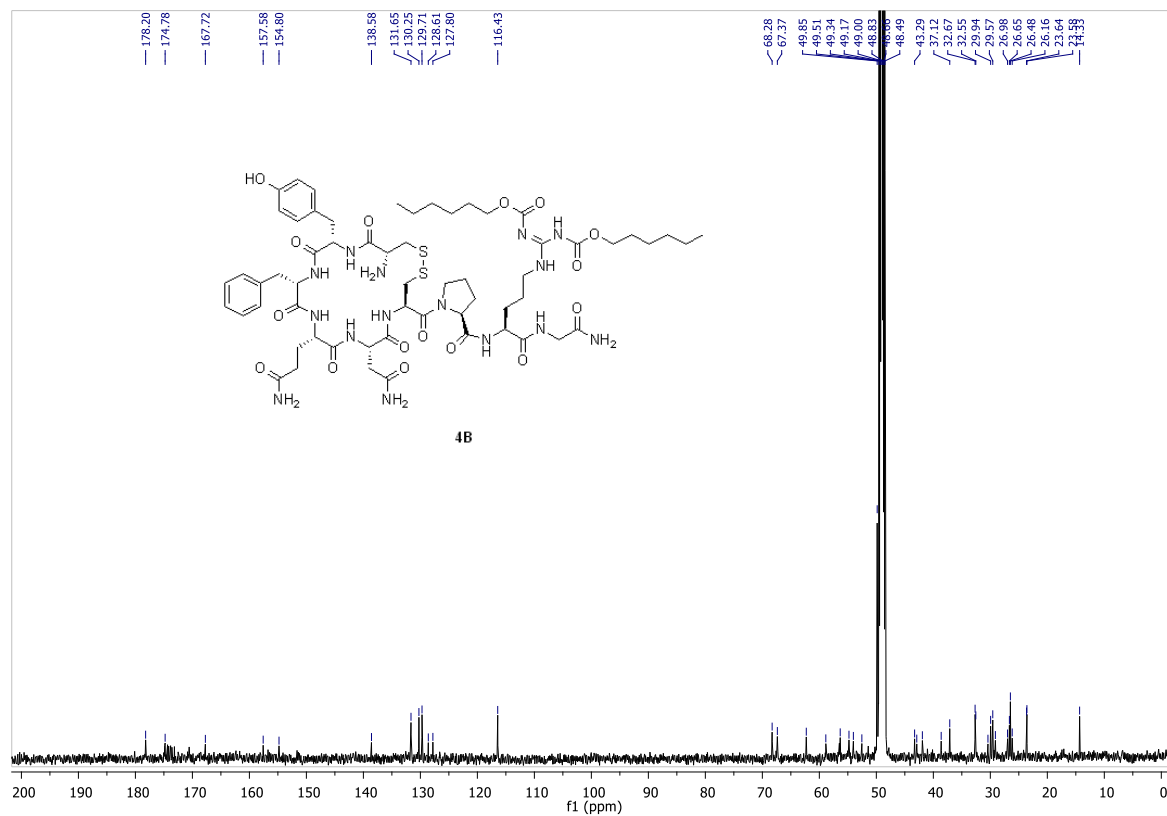

Figure S46. <sup>13</sup>C NMR spectrum of **4B**.

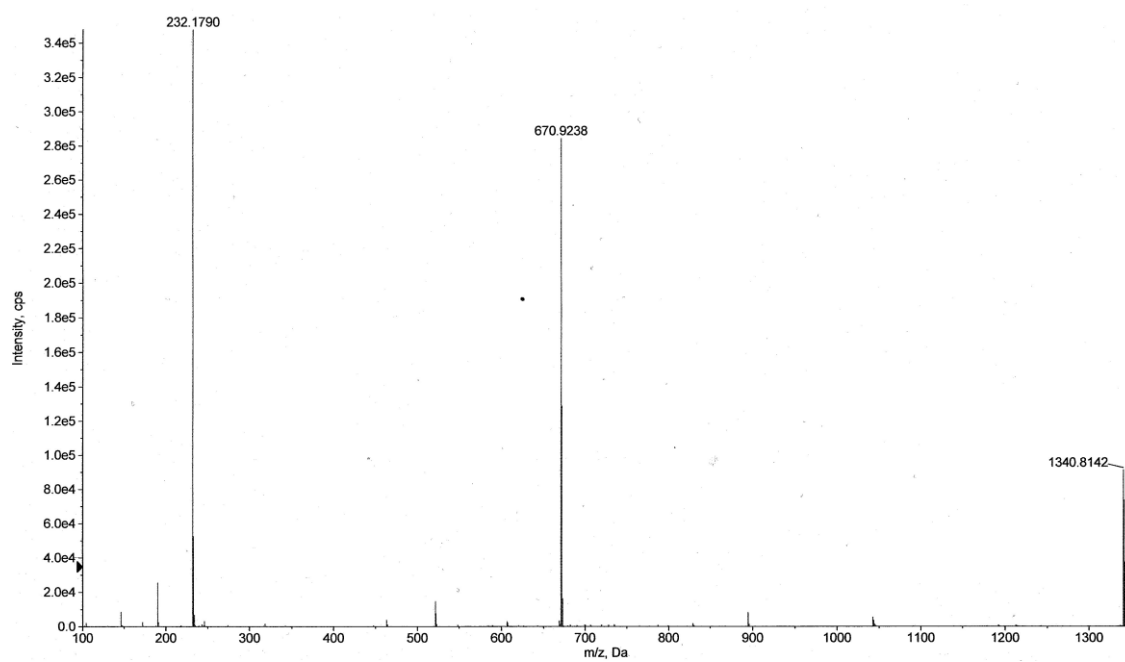

**Figure S47.** ESI-MS spectrum of **4B**.

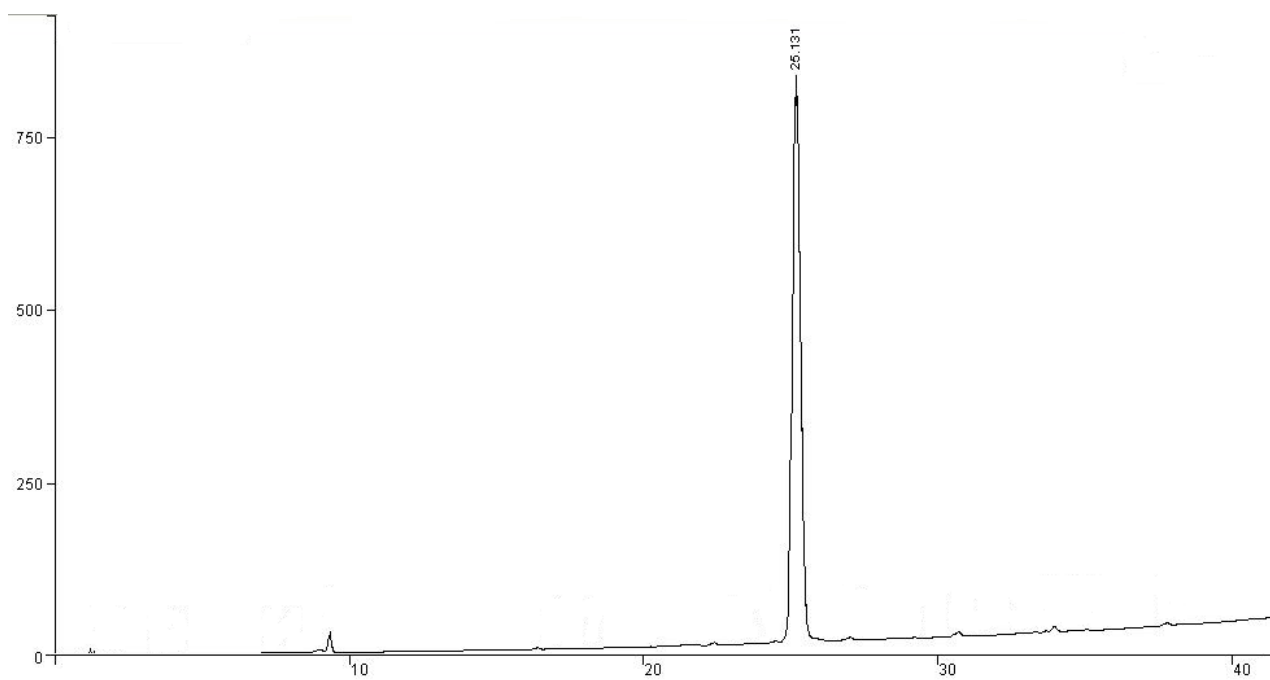

**Figure S48.** HPLC spectrum of **4B**.

#### 4.1. Reaction of **3** and **5** with *iso*-butylamine

Product of **1** and *iso*-butylamine was not detected on MALDI.

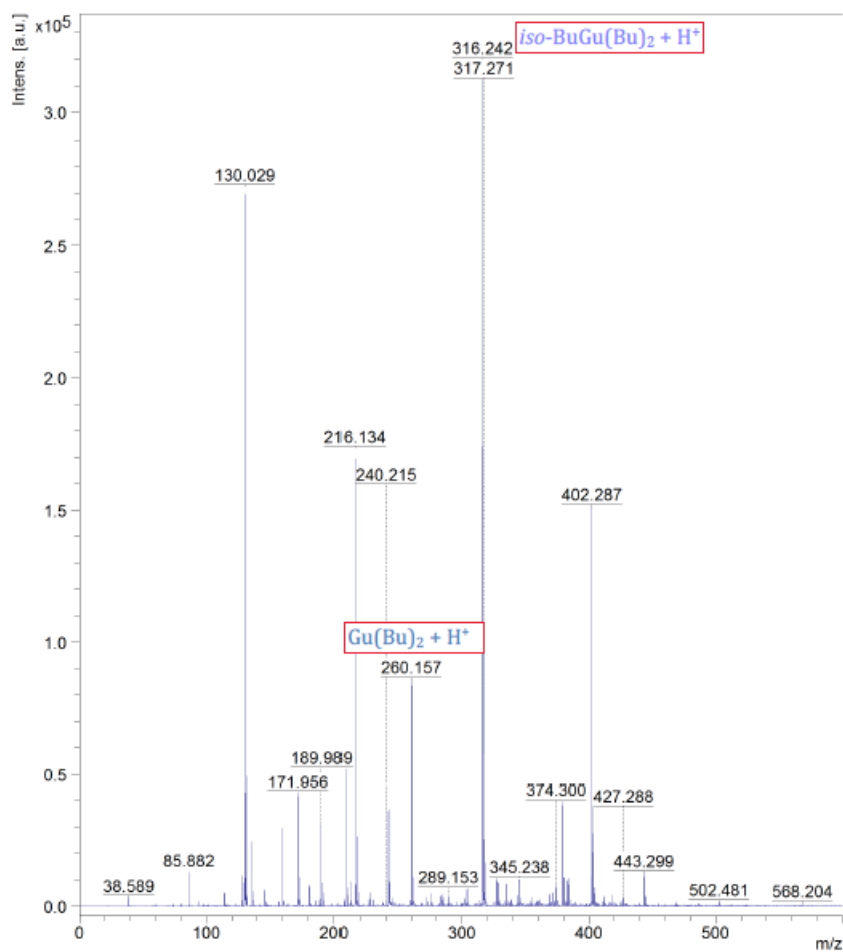

**Figure S49.** MALDI-MS spectrum of reaction mixture of **3** and *iso*-butylamine.

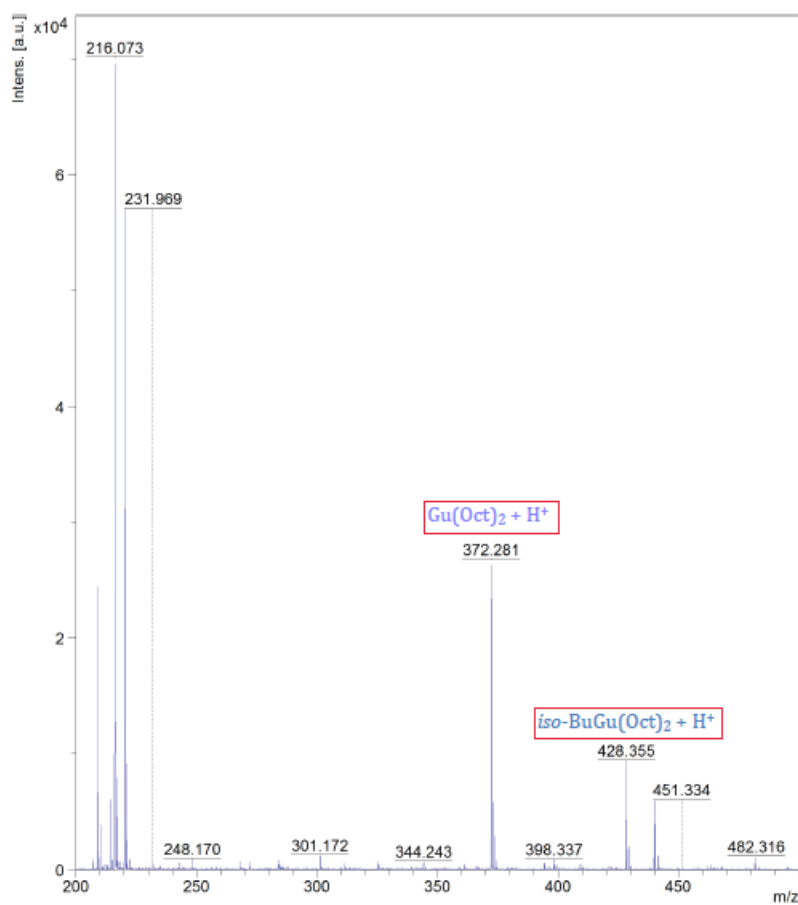

**Figure S50.** MALDI-MS spectrum of reaction mixture of **5** and *iso*-butylamine.

#### 4.2. NMR comparison of compounds 1 and 2

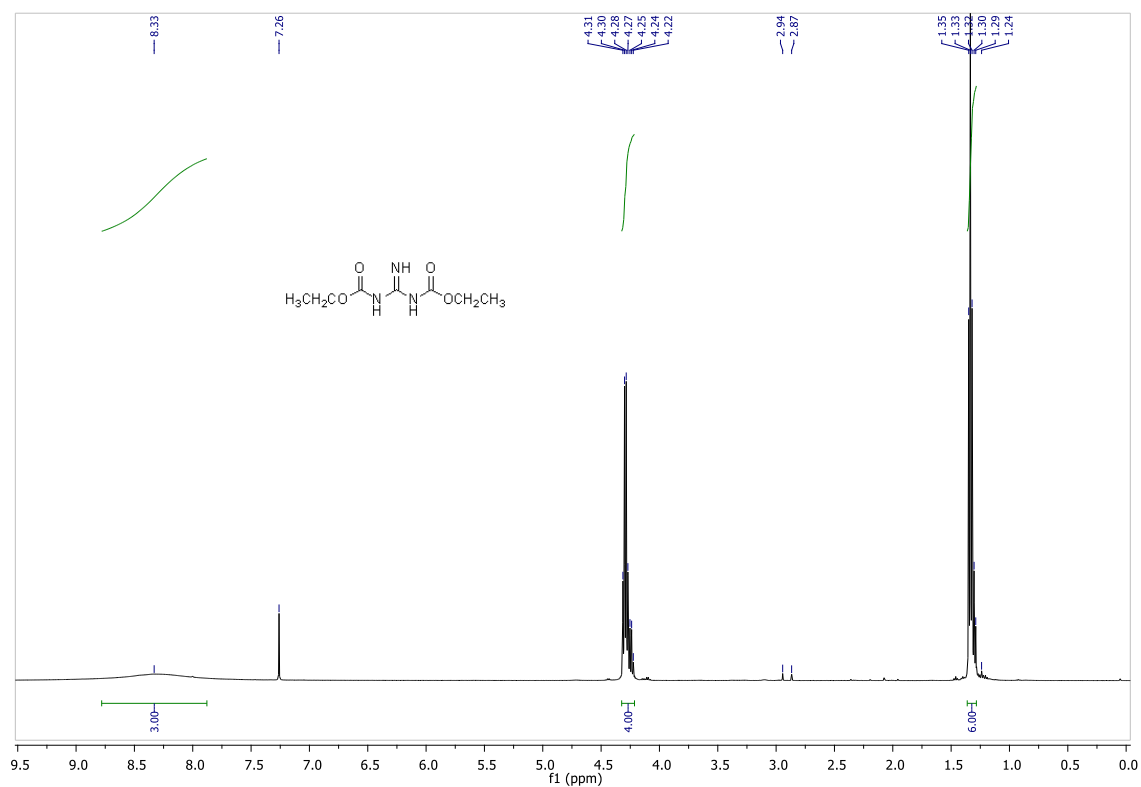

Figure S51.  $^1\text{H}$  NMR ( $\text{CDCl}_3$ ) spectrum of 1.

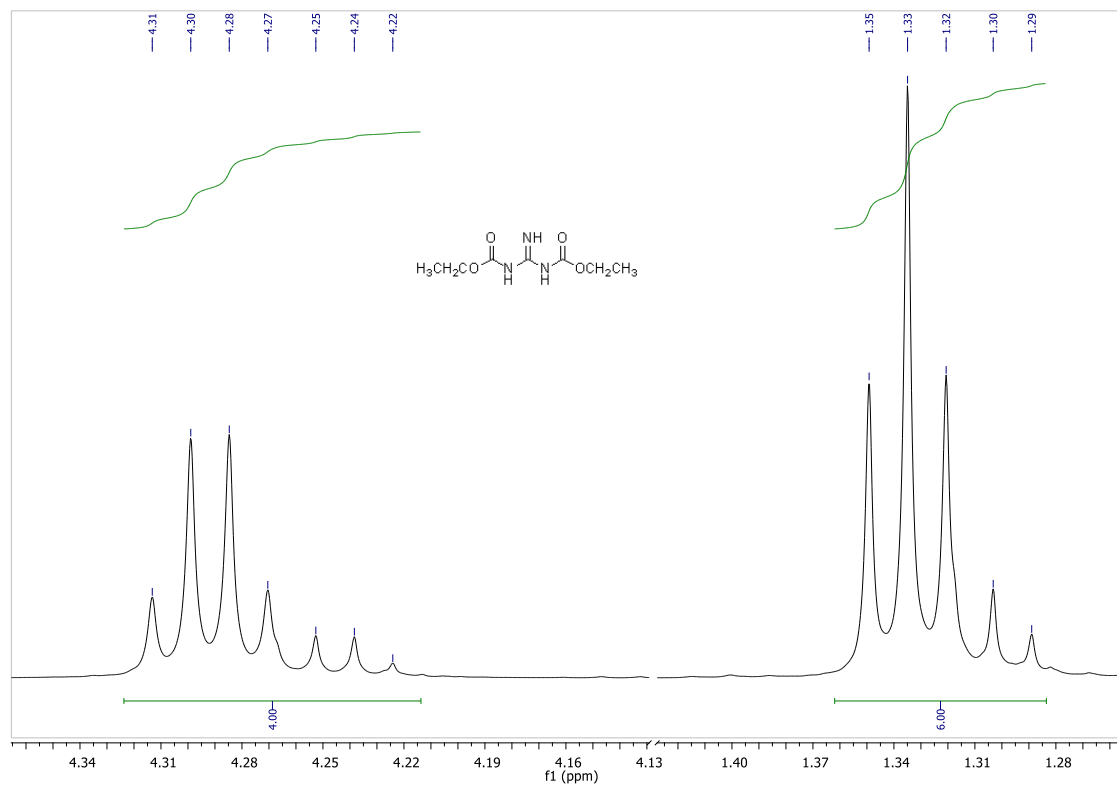

Figure S52. Enlarged view of signals in  $^1\text{H}$  NMR ( $\text{CDCl}_3$ ) for  $\text{CH}_3\text{CH}_2$ - atoms of 1.

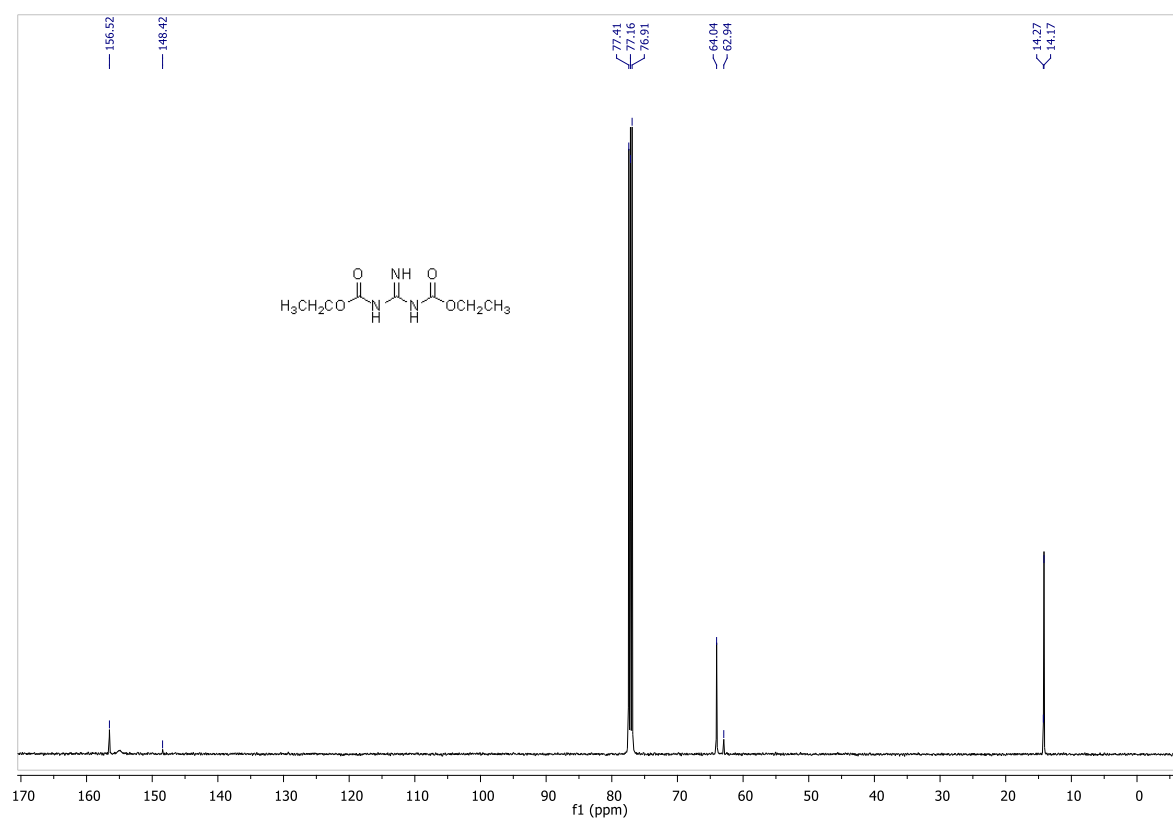

**Figure S53.** <sup>13</sup>C NMR (CDCl<sub>3</sub>) spectrum of 1.

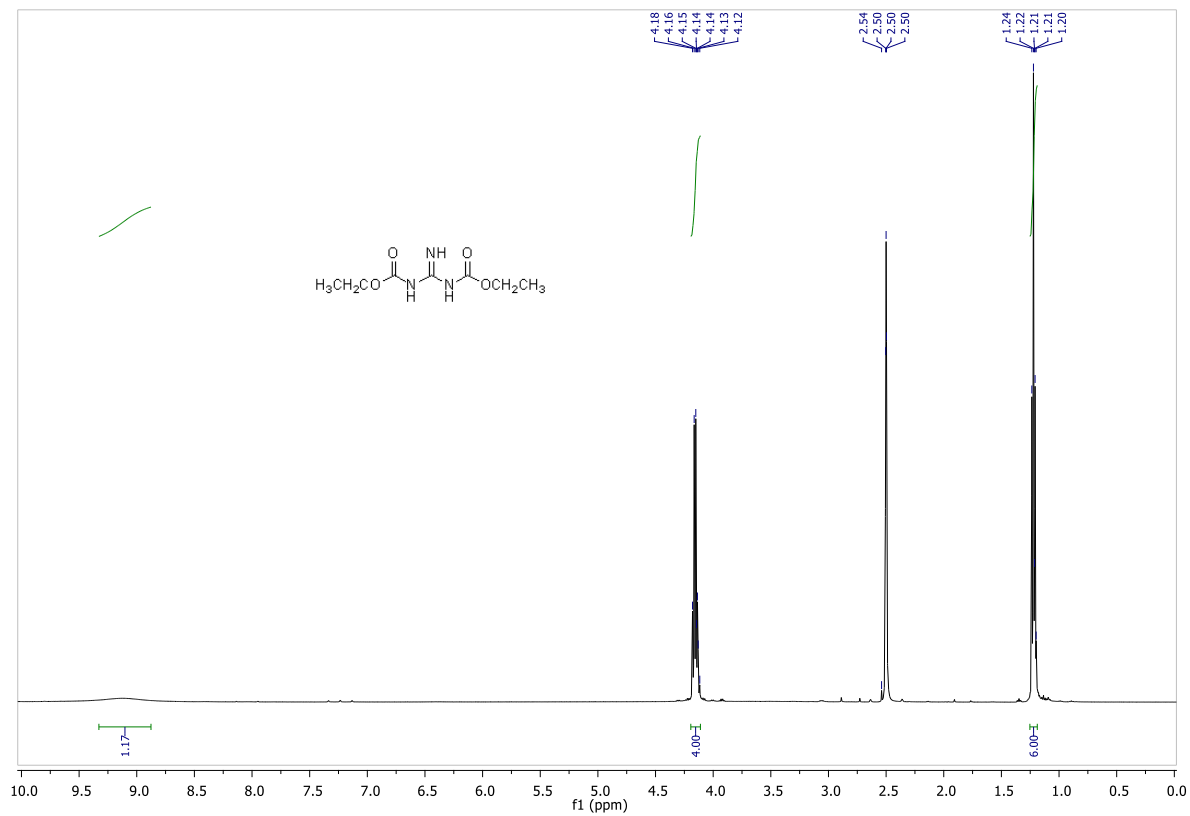

**Figure S54.** <sup>1</sup>H NMR (DMSO) spectrum of 1.

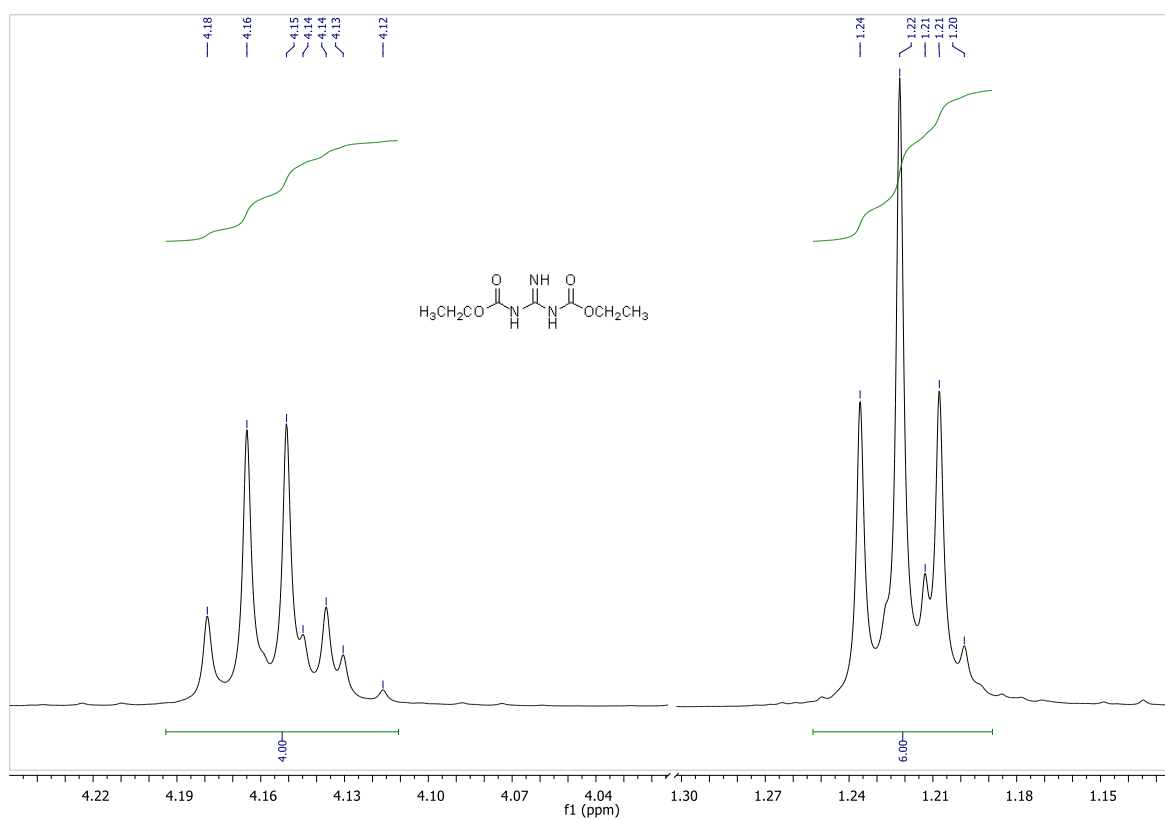

**Figure S55.** Enlarged view of signals in  $^1\text{H}$  NMR (DMSO) for  $\text{CH}_3\text{CH}_2$ - atoms of **1**.

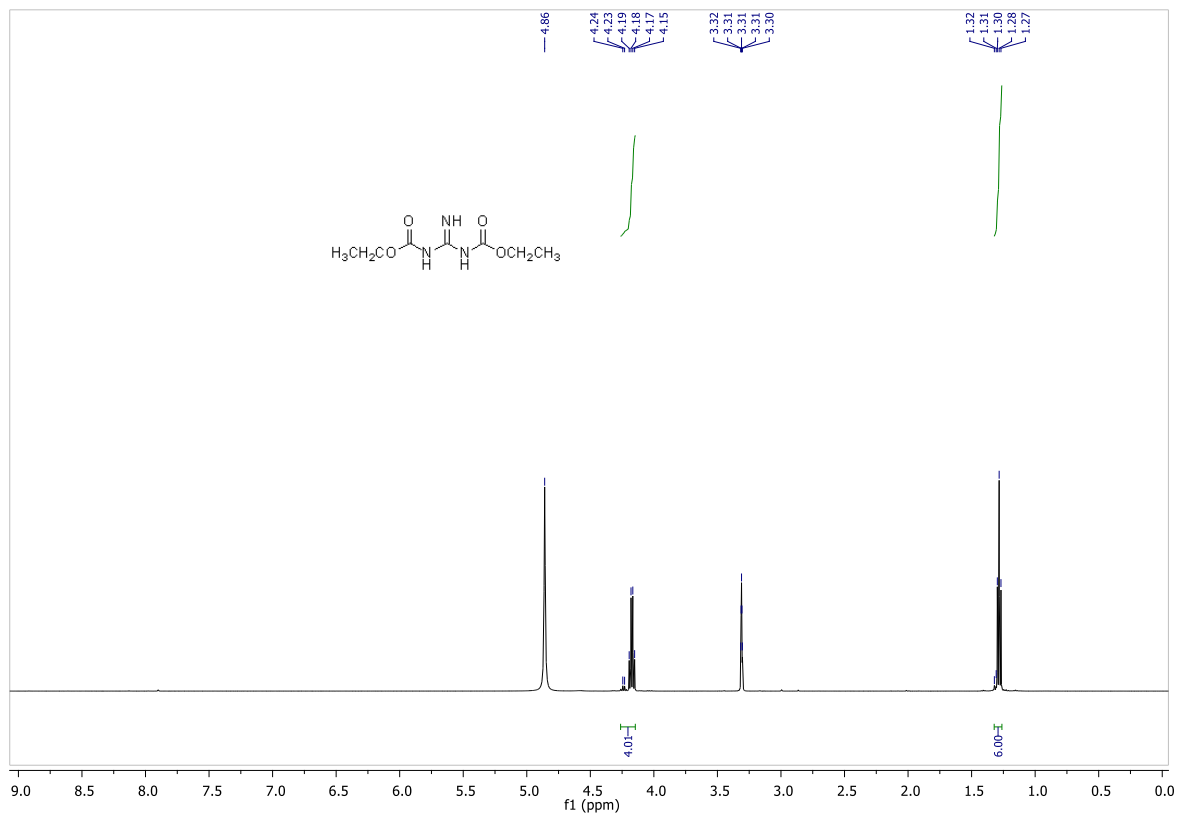

**Figure S56.**  $^1\text{H}$  NMR ( $\text{CD}_3\text{OD}$ ) spectrum of **1**.

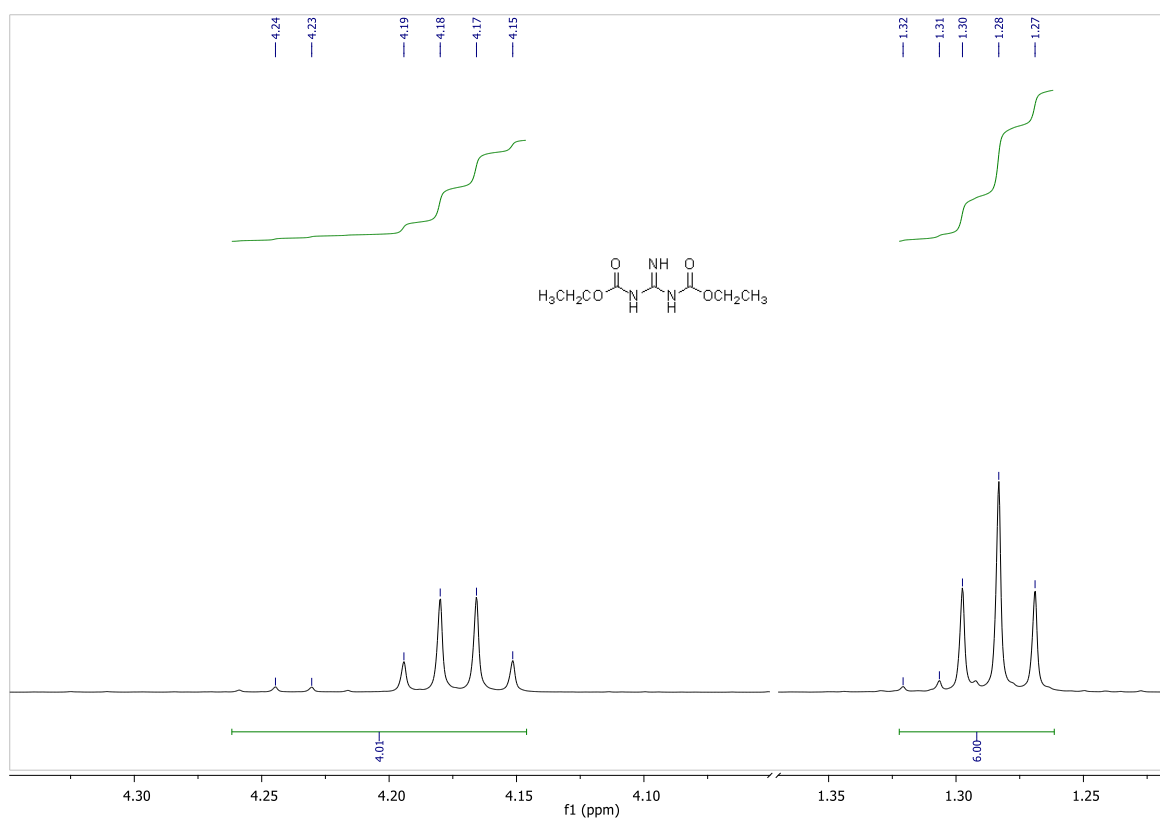

**Figure S57.** Enlarged view of signals in <sup>1</sup>H NMR (CD<sub>3</sub>OD) for CH<sub>3</sub>CH<sub>2</sub>- atoms of **1**.

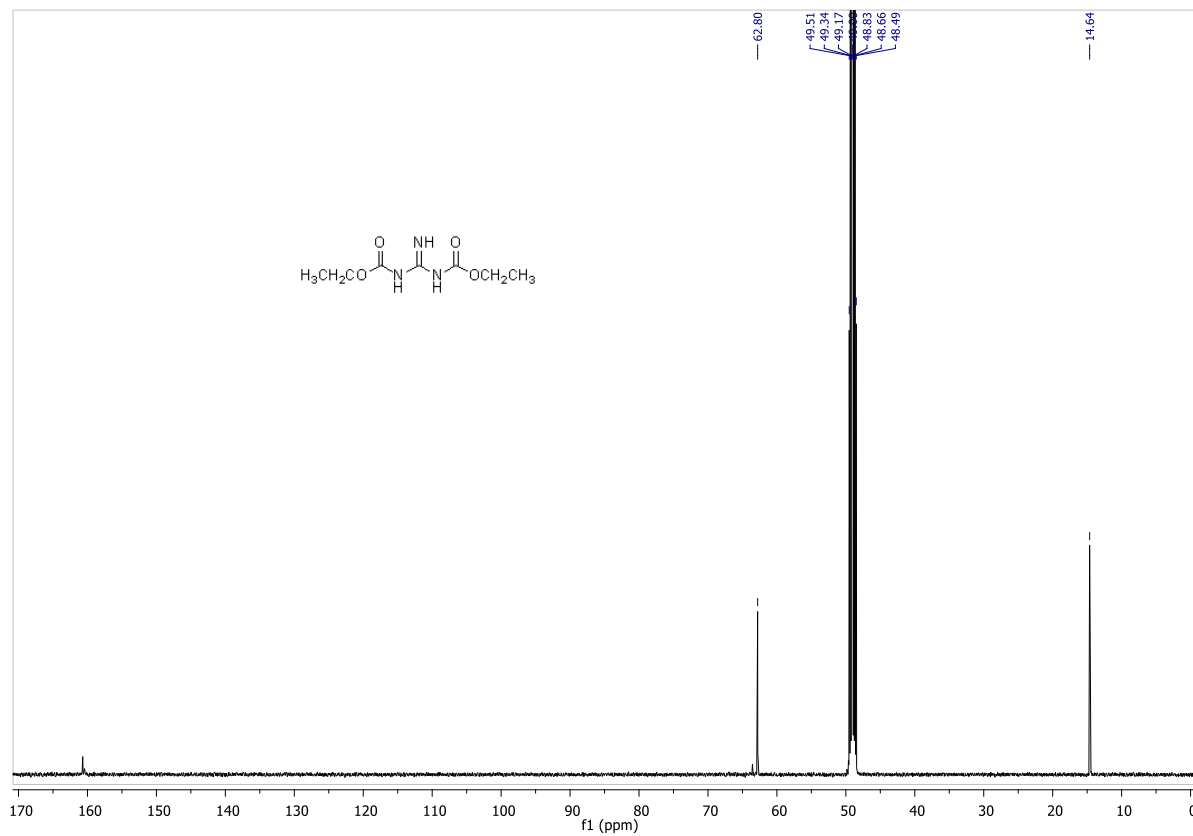

**Figure S58.** <sup>13</sup>C NMR (CD<sub>3</sub>OD) spectrum of **1**.

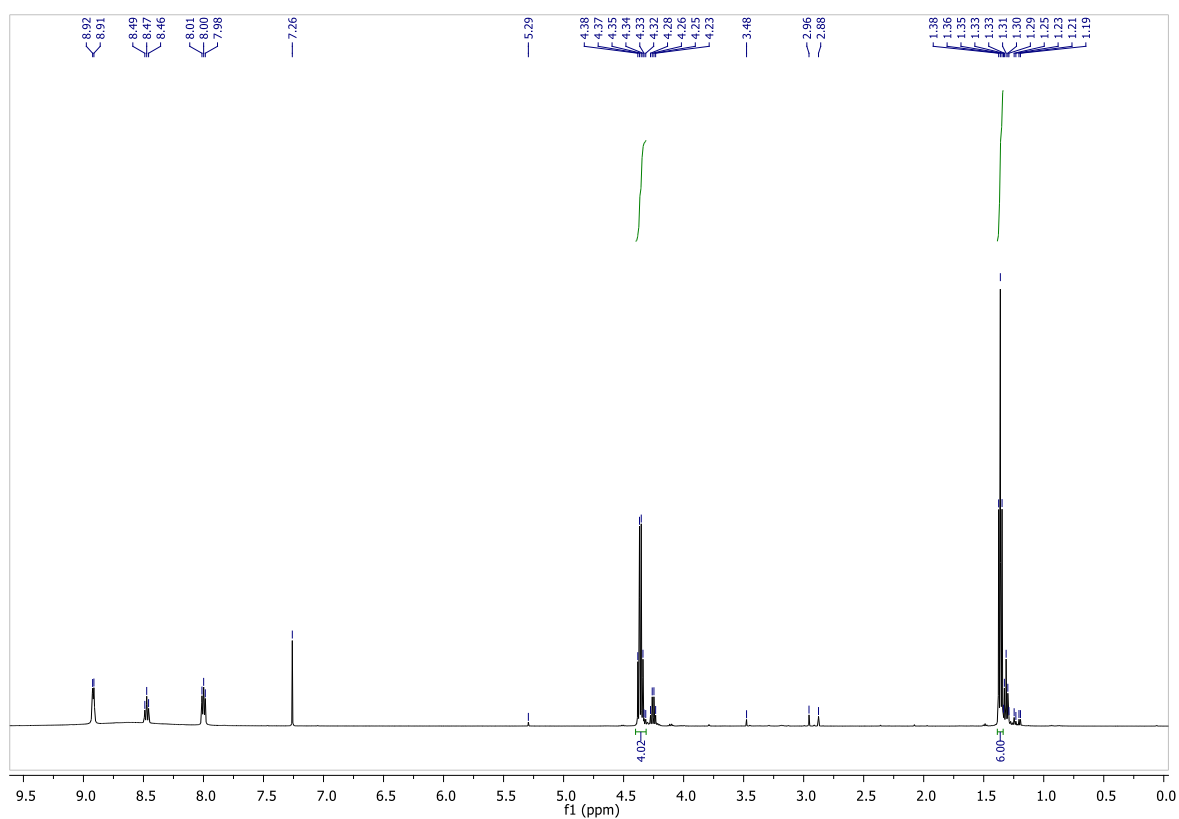

**Figure S59.** <sup>1</sup>H NMR (CDCl<sub>3</sub>) spectrum of reaction mixture of **1**, Py and Tf<sub>2</sub>O (step 2).

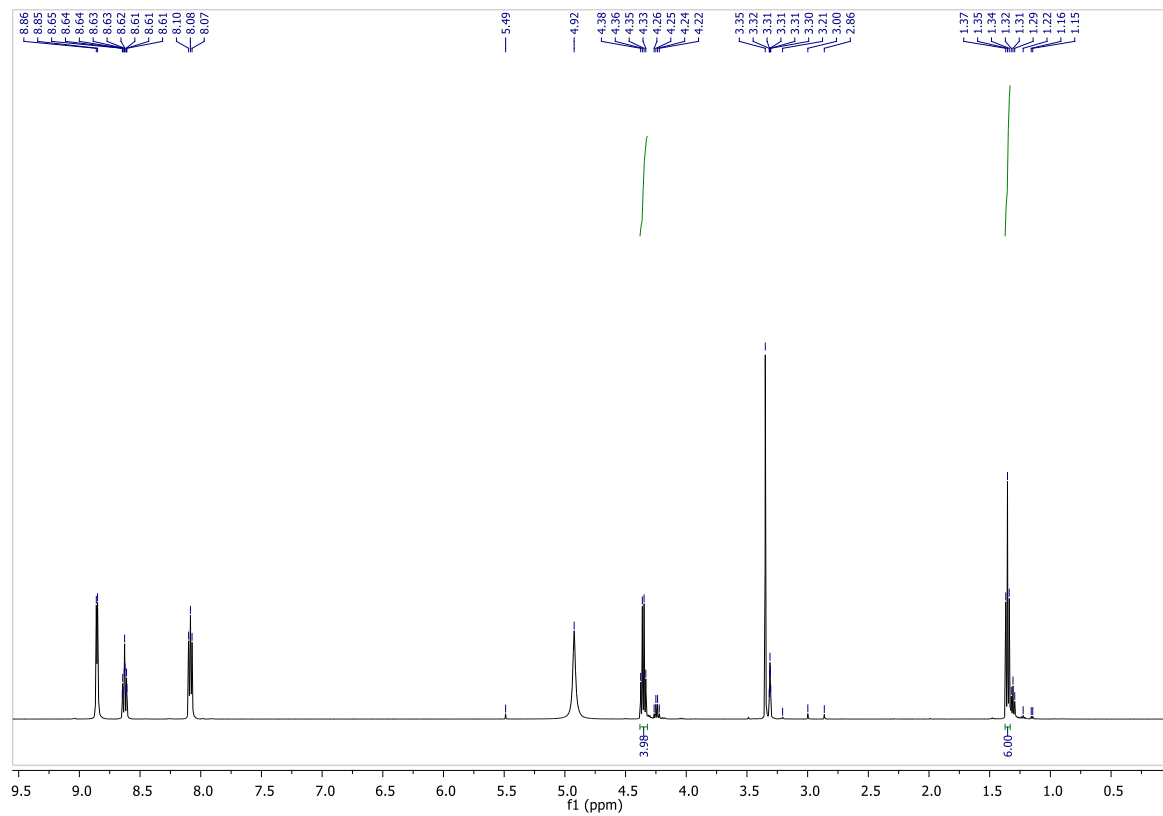

**Figure S60.** <sup>1</sup>H NMR (CD<sub>3</sub>OD) spectrum of reaction mixture of **1**, Py and Tf<sub>2</sub>O (step 2).

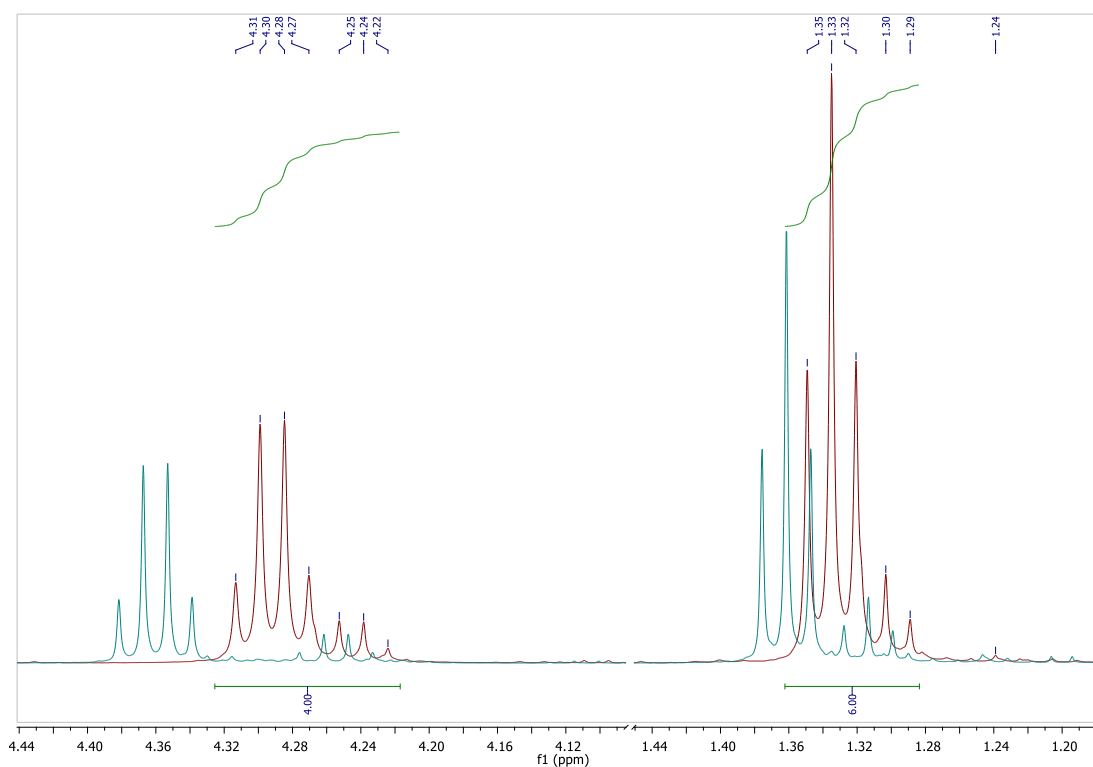

**Figure S61.** Enlarged view of signals comparison in  $^1\text{H}$  NMR ( $\text{CDCl}_3$ ) for  $\text{CH}_3\text{CH}_2$ - atoms of **1** (red) and reaction mixture of **1**, Py and  $\text{Tf}_2\text{O}$  (blue).

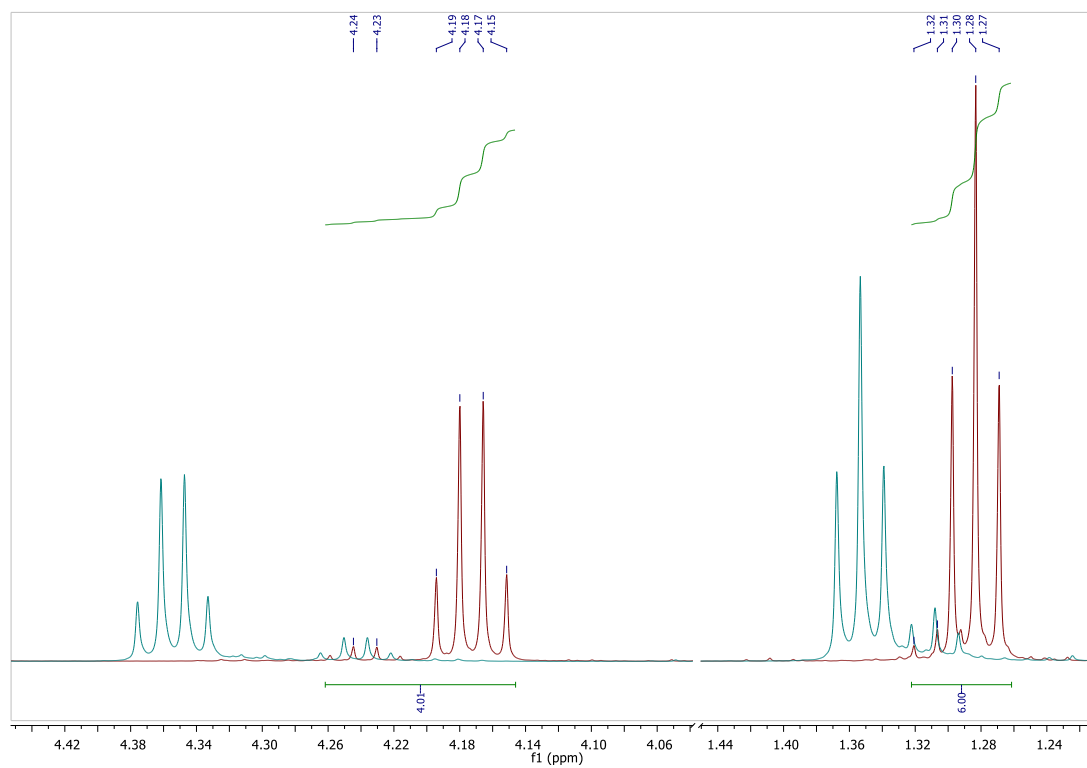

**Figure S62.** Enlarged view of signals comparison in  $^1\text{H}$  NMR ( $\text{CD}_3\text{OD}$ ) for  $\text{CH}_3\text{CH}_2$ - atoms of **1** (red) and reaction mixture of **1**, Py and  $\text{Tf}_2\text{O}$  (blue).

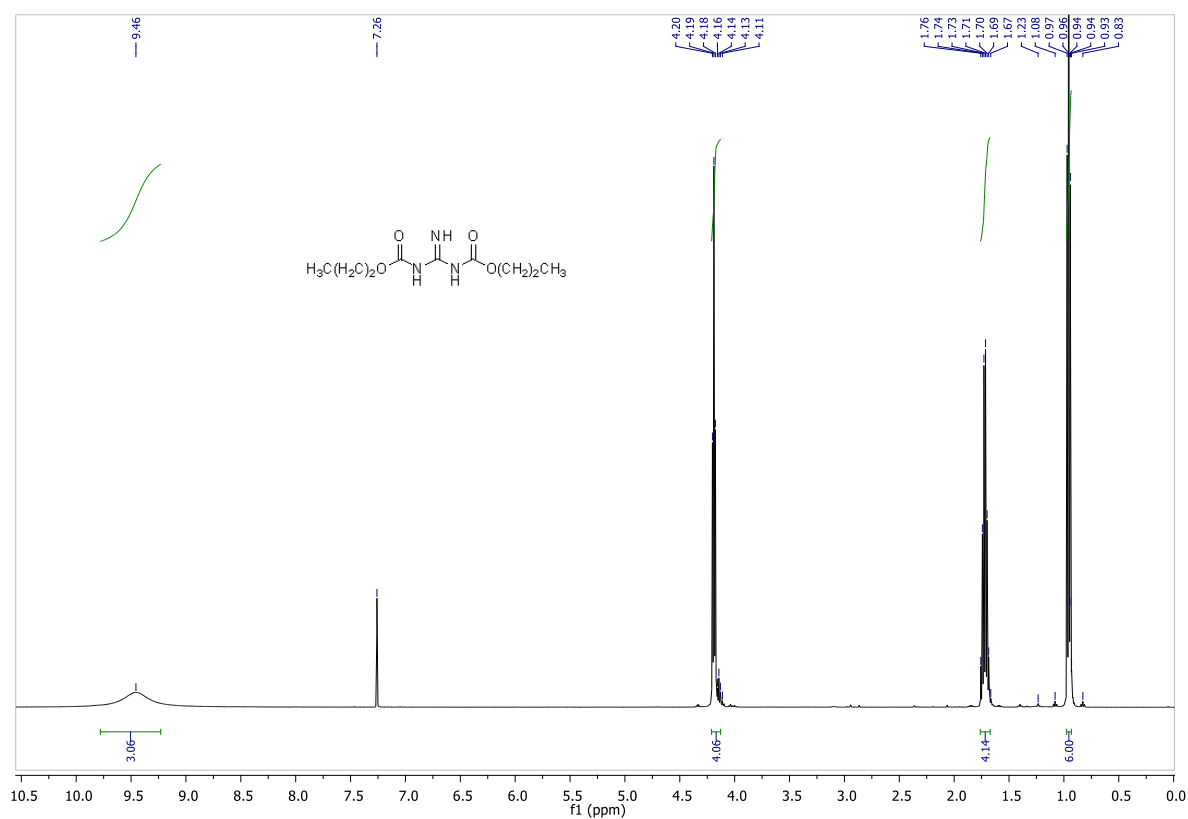

**Figure S63.** <sup>1</sup>H NMR (CDCl<sub>3</sub>) spectrum of **2**.

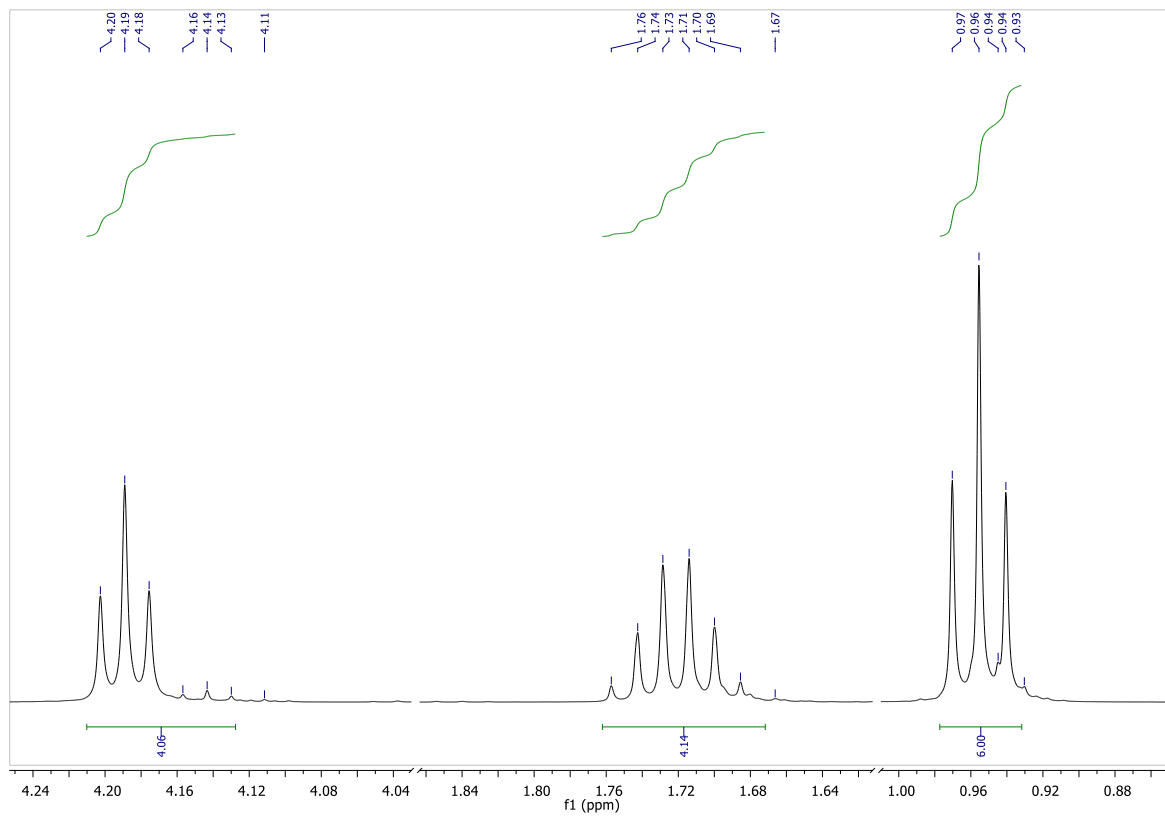

**Figure S64.** Enlarged view of signals in <sup>1</sup>H NMR (CDCl<sub>3</sub>) for CH<sub>3</sub>CH<sub>2</sub>CH<sub>2</sub>- atoms of **2**.

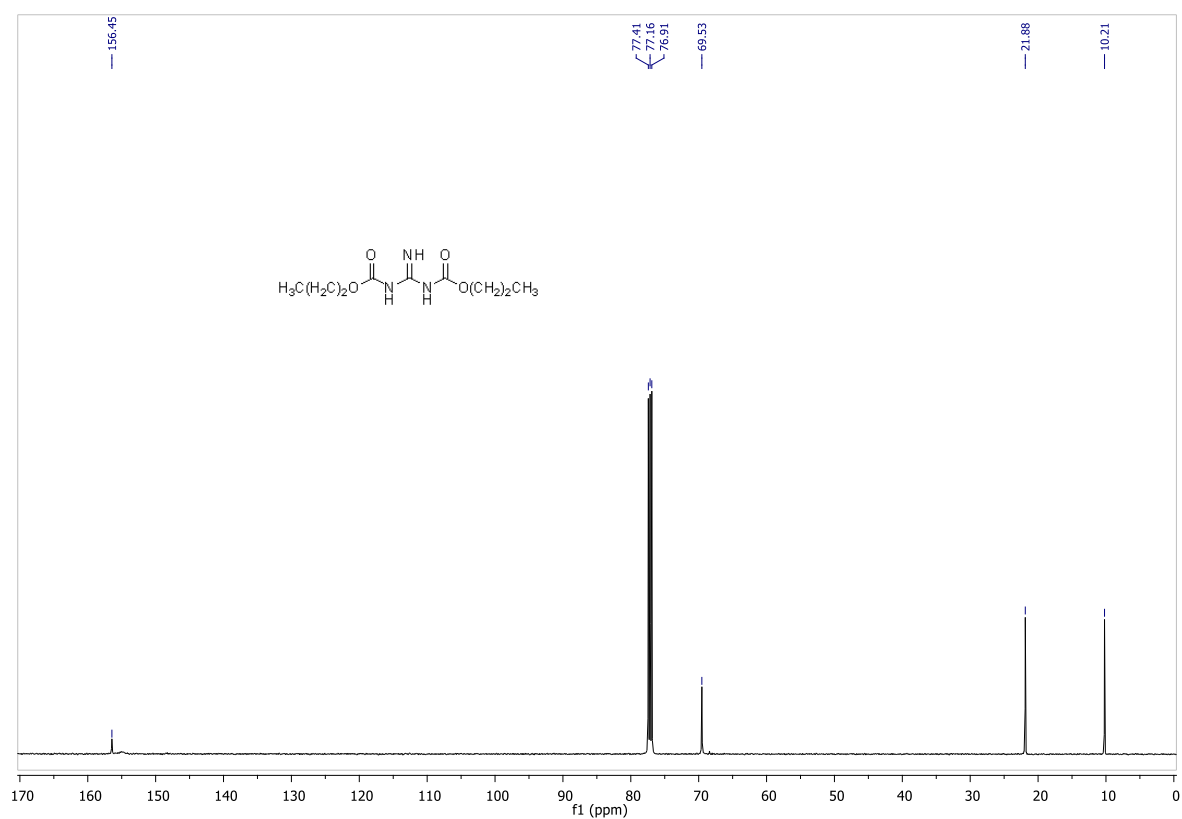

**Figure S65.** <sup>13</sup>C NMR (CDCl<sub>3</sub>) spectrum of **2**.

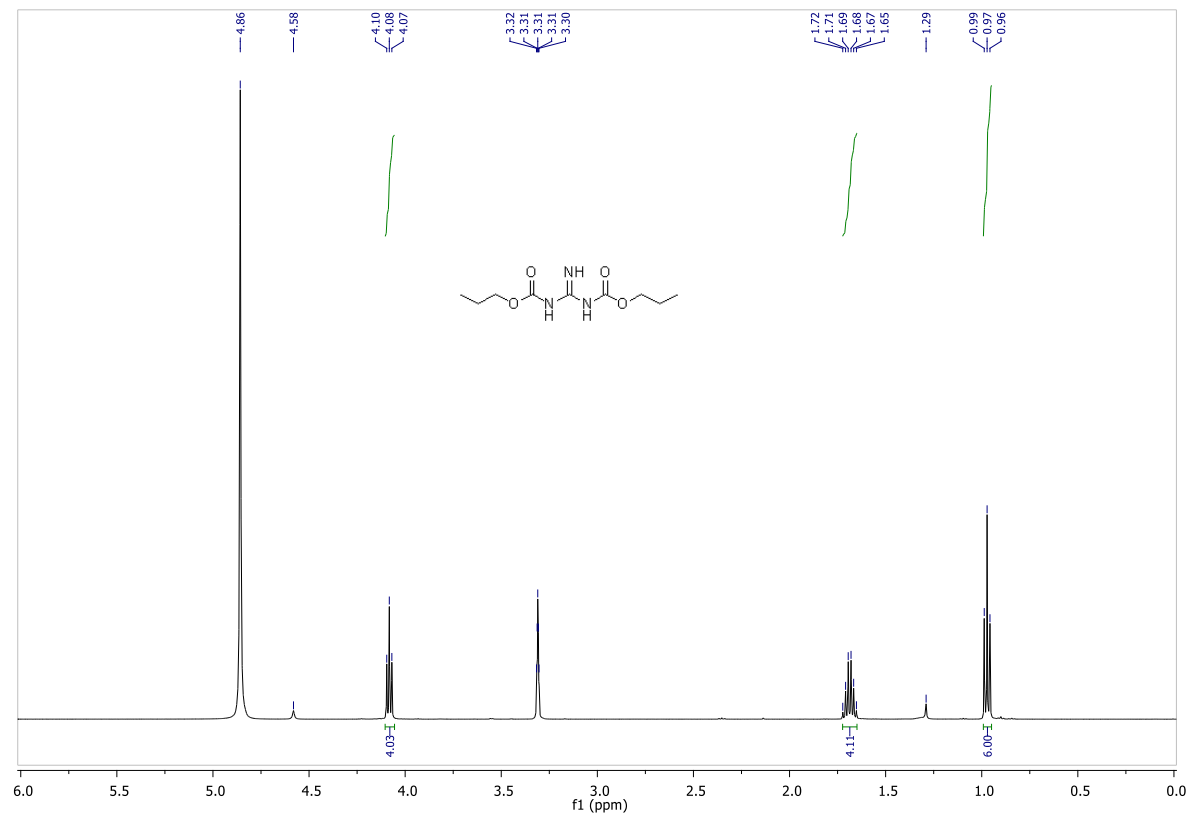

**Figure S66.** <sup>1</sup>H NMR (CD<sub>3</sub>OD) spectrum of **2**.

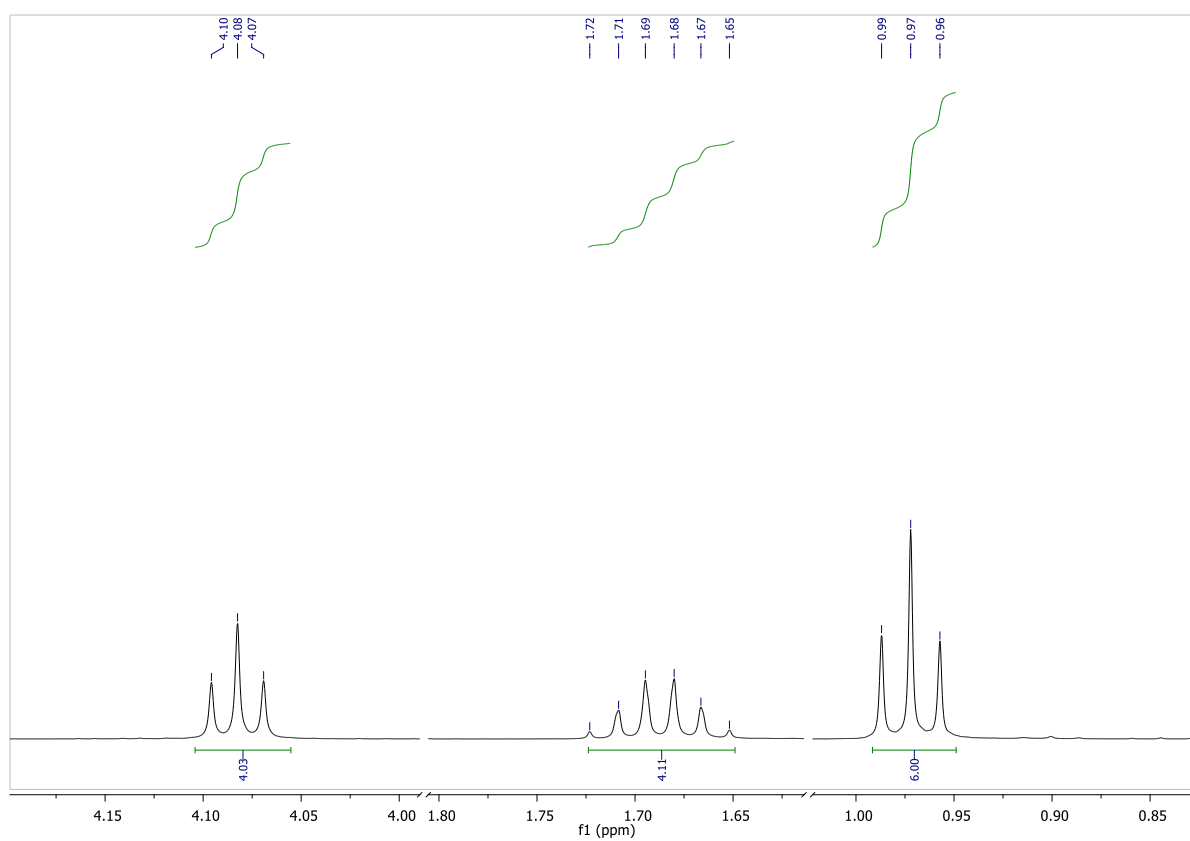

**Figure S67.** Enlarged view of signals in  $^1\text{H}$  NMR ( $\text{CD}_3\text{OD}$ ) for  $\text{CH}_3\text{CH}_2\text{CH}_2$ - atoms of **2**.

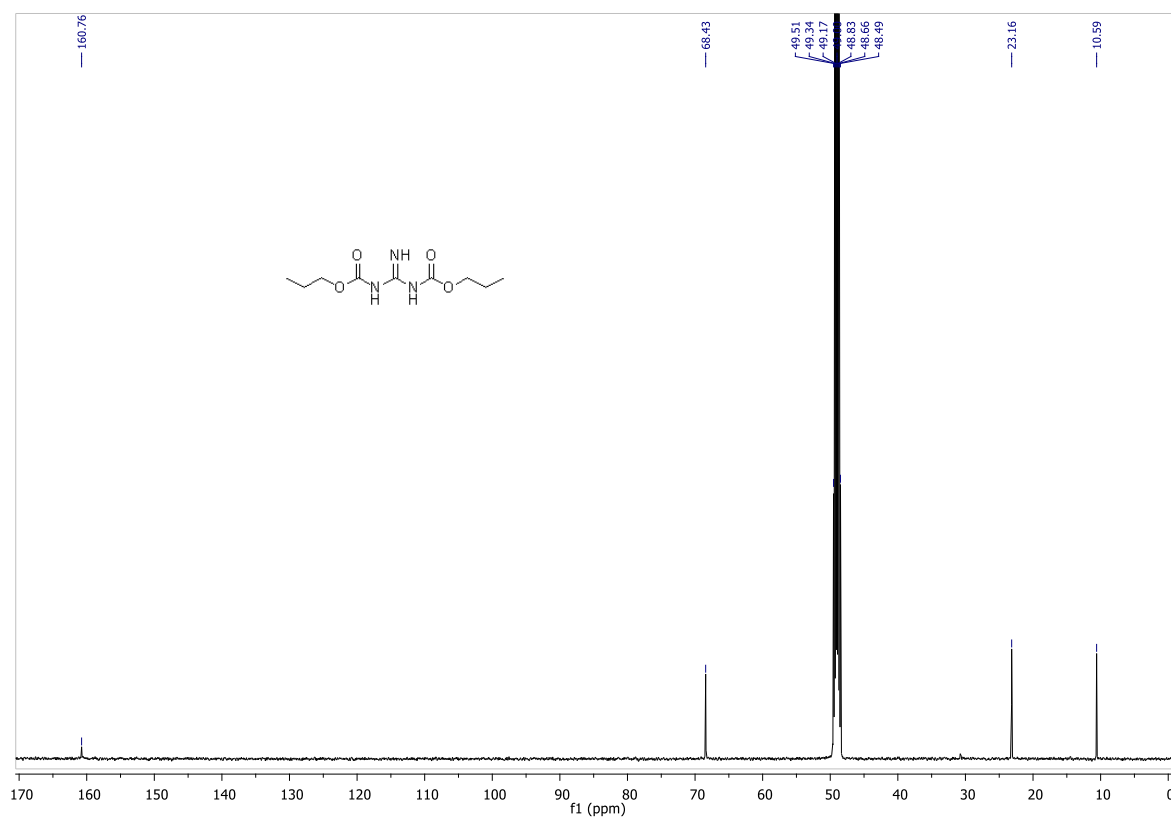

**Figure S68.**  $^{13}\text{C}$  NMR ( $\text{CD}_3\text{OD}$ ) spectrum of **2**.
